# Supplementary material for: MYB Transcription Factor Family in Pearl Millet: Genome-Wide Identification, Evolutionary Progression and Expression Analysis Under Abiotic Stress and Phytohormone Treatments
Source: Preprints.org preprint supplement (doi:10.20944/preprints202208.0315.v1), 2022-08-17
Supplement: Supplementary file 1 [file supplementary]

## Sheet: S. Italica
List of collinear pairs between PgMYB and SiMYB
# Number of collinear genes: 343, Percentage: 70.29
# Number of all genes: 488
## Alignment 0: score=281.0 e_value=3e-11 N=6 Pg1&Si2 minus
0- 0:	PgMYB2	SiMYB049	4e-85
0- 1:	PgMYB4	SiMYB046	2e-74
0- 2:	PgMYB8	SiMYB045	3e-77
0- 3:	PgMYB9	SiMYB037	2e-89
0- 4:	PgMYB10	SiMYB035	1e-68
0- 5:	PgMYB11	SiMYB028	1e-88
## Alignment 1: score=371.0 e_value=1.8e-16 N=8 Pg1&Si3 plus
1- 0:	PgMYB18	SiMYB051	1e-54
1- 1:	PgMYB23	SiMYB052	1e-46
1- 2:	PgMYB25	SiMYB055	3e-46
1- 3:	PgMYB27	SiMYB064	2e-26
1- 4:	PgMYB28	SiMYB065	5e-124
1- 5:	PgMYB34	SiMYB067	1e-79
1- 6:	PgMYB38	SiMYB074	3e-61
1- 7:	PgMYB40	SiMYB079	9e-15
## Alignment 2: score=289.0 e_value=1.5e-11 N=6 Pg1&Si3 plus
2- 0:	PgMYB27	SiMYB051	3e-14
2- 1:	PgMYB28	SiMYB054	6e-61
2- 2:	PgMYB34	SiMYB055	0
2- 3:	PgMYB38	SiMYB058	1e-93
2- 4:	PgMYB40	SiMYB060	8e-97
2- 5:	PgMYB41	SiMYB061	0
## Alignment 3: score=274.0 e_value=8.2e-12 N=6 Pg1&Si3 plus
3- 0:	PgMYB2	SiMYB054	4e-83
3- 1:	PgMYB11	SiMYB056	1e-97
3- 2:	PgMYB19	SiMYB061	5e-80
3- 3:	PgMYB25	SiMYB067	3e-123
3- 4:	PgMYB27	SiMYB071	8e-14
3- 5:	PgMYB28	SiMYB075	6e-58
## Alignment 4: score=522.0 e_value=4.5e-29 N=11 Pg1&Si3 minus
4- 0:	PgMYB7	SiMYB079	2e-36
4- 1:	PgMYB10	SiMYB078	6e-34
4- 2:	PgMYB15	SiMYB071	2e-23
4- 3:	PgMYB17	SiMYB070	1e-13
4- 4:	PgMYB22	SiMYB069	0
4- 5:	PgMYB23	SiMYB068	0
4- 6:	PgMYB26	SiMYB066	7e-87
4- 7:	PgMYB32	SiMYB063	9e-113
4- 8:	PgMYB33	SiMYB062	5e-163
4- 9:	PgMYB35	SiMYB054	2e-107
4- 10:	PgMYB37	SiMYB053	0
## Alignment 5: score=303.0 e_value=4.3e-14 N=7 Pg1&Si5 plus
5- 0:	PgMYB7	SiMYB102	2e-31
5- 1:	PgMYB15	SiMYB108	3e-23
5- 2:	PgMYB18	SiMYB117	9e-51
5- 3:	PgMYB25	SiMYB118	5e-50
5- 4:	PgMYB26	SiMYB124	3e-79
5- 5:	PgMYB27	SiMYB134	2e-14
5- 6:	PgMYB40	SiMYB135	5e-15
## Alignment 6: score=319.0 e_value=2.4e-11 N=7 Pg1&Si5 minus
6- 0:	PgMYB15	SiMYB134	4e-24
6- 1:	PgMYB19	SiMYB131	1e-162
6- 2:	PgMYB25	SiMYB126	1e-83
6- 3:	PgMYB27	SiMYB121	1e-23
6- 4:	PgMYB32	SiMYB116	3e-40
6- 5:	PgMYB34	SiMYB106	0
6- 6:	PgMYB41	SiMYB102	0
## Alignment 7: score=379.0 e_value=2.2e-21 N=8 Pg1&Si6 minus
7- 0:	PgMYB4	SiMYB151	5e-77
7- 1:	PgMYB6	SiMYB150	2e-146
7- 2:	PgMYB8	SiMYB149	0
7- 3:	PgMYB9	SiMYB148	2e-169
7- 4:	PgMYB10	SiMYB147	2e-125
7- 5:	PgMYB11	SiMYB146	8e-128
7- 6:	PgMYB23	SiMYB145	9e-66
7- 7:	PgMYB32	SiMYB142	8e-40
## Alignment 8: score=346.0 e_value=1.5e-10 N=7 Pg2&Si1 plus
8- 0:	PgMYB79	SiMYB001	0
8- 1:	PgMYB82	SiMYB002	0
8- 2:	PgMYB85	SiMYB003	0
8- 3:	PgMYB86	SiMYB004	0
8- 4:	PgMYB87	SiMYB005	0
8- 5:	PgMYB88	SiMYB006	0
8- 6:	PgMYB89	SiMYB007	3e-157
## Alignment 9: score=320.0 e_value=3.1e-14 N=7 Pg2&Si3 minus
9- 0:	PgMYB48	SiMYB078	2e-37
9- 1:	PgMYB49	SiMYB077	5e-41
9- 2:	PgMYB51	SiMYB073	2e-35
9- 3:	PgMYB56	SiMYB070	2e-33
9- 4:	PgMYB58	SiMYB067	4e-49
9- 5:	PgMYB76	SiMYB056	9e-105
9- 6:	PgMYB81	SiMYB051	2e-11
## Alignment 10: score=332.0 e_value=7e-14 N=7 Pg2&Si4 plus
10- 0:	PgMYB67	SiMYB080	5e-162
10- 1:	PgMYB68	SiMYB081	1e-129
10- 2:	PgMYB71	SiMYB082	0
10- 3:	PgMYB73	SiMYB085	9e-93
10- 4:	PgMYB77	SiMYB087	2e-98
10- 5:	PgMYB85	SiMYB094	9e-25
10- 6:	PgMYB88	SiMYB099	4e-163
## Alignment 11: score=267.0 e_value=9.9e-10 N=6 Pg2&Si7 plus
11- 0:	PgMYB47	SiMYB157	2e-75
11- 1:	PgMYB52	SiMYB160	4e-25
11- 2:	PgMYB54	SiMYB165	6e-12
11- 3:	PgMYB60	SiMYB168	1e-49
11- 4:	PgMYB73	SiMYB170	7e-60
11- 5:	PgMYB82	SiMYB174	2e-36
## Alignment 12: score=677.0 e_value=6.6e-42 N=14 Pg2&Si9 plus
12- 0:	PgMYB47	SiMYB181	0
12- 1:	PgMYB48	SiMYB182	6e-83
12- 2:	PgMYB49	SiMYB183	1e-151
12- 3:	PgMYB50	SiMYB184	0
12- 4:	PgMYB53	SiMYB186	4e-56
12- 5:	PgMYB55	SiMYB188	8e-175
12- 6:	PgMYB57	SiMYB189	9e-73
12- 7:	PgMYB58	SiMYB190	2e-94
12- 8:	PgMYB59	SiMYB191	2e-161
12- 9:	PgMYB60	SiMYB192	4e-62
12- 10:	PgMYB61	SiMYB193	1e-179
12- 11:	PgMYB62	SiMYB194	6e-63
12- 12:	PgMYB73	SiMYB199	4e-65
12- 13:	PgMYB82	SiMYB209	1e-30
## Alignment 13: score=517.0 e_value=6.3e-30 N=11 Pg3&Si1 plus
13- 0:	PgMYB92	SiMYB004	5e-115
13- 1:	PgMYB94	SiMYB005	1e-57
13- 2:	PgMYB106	SiMYB007	5e-73
13- 3:	PgMYB117	SiMYB011	1e-96
13- 4:	PgMYB123	SiMYB012	9e-88
13- 5:	PgMYB124	SiMYB013	8e-96
13- 6:	PgMYB126	SiMYB014	2e-81
13- 7:	PgMYB131	SiMYB016	2e-65
13- 8:	PgMYB132	SiMYB017	4e-31
13- 9:	PgMYB134	SiMYB019	1e-93
13- 10:	PgMYB135	SiMYB020	1e-120
## Alignment 14: score=735.0 e_value=2.2e-43 N=15 Pg3&Si1 minus
14- 0:	PgMYB92	SiMYB024	0
14- 1:	PgMYB93	SiMYB023	5e-105
14- 2:	PgMYB96	SiMYB022	0
14- 3:	PgMYB97	SiMYB021	3e-102
14- 4:	PgMYB100	SiMYB019	2e-178
14- 5:	PgMYB101	SiMYB017	4e-35
14- 6:	PgMYB103	SiMYB016	8e-179
14- 7:	PgMYB105	SiMYB015	1e-64
14- 8:	PgMYB106	SiMYB014	1e-97
14- 9:	PgMYB107	SiMYB013	2e-149
14- 10:	PgMYB108	SiMYB012	5e-165
14- 11:	PgMYB109	SiMYB011	6e-103
14- 12:	PgMYB111	SiMYB004	2e-21
14- 13:	PgMYB112	SiMYB002	5e-52
14- 14:	PgMYB114	SiMYB001	4e-42
## Alignment 15: score=312.0 e_value=5.4e-12 N=7 Pg3&Si2 plus
15- 0:	PgMYB91	SiMYB030	5e-48
15- 1:	PgMYB93	SiMYB031	3e-76
15- 2:	PgMYB99	SiMYB035	1e-35
15- 3:	PgMYB115	SiMYB042	2e-64
15- 4:	PgMYB119	SiMYB045	4e-67
15- 5:	PgMYB126	SiMYB047	1e-57
15- 6:	PgMYB135	SiMYB048	7e-52
## Alignment 16: score=257.0 e_value=2.3e-13 N=6 Pg3&Si3 minus
16- 0:	PgMYB98	SiMYB071	2e-11
16- 1:	PgMYB106	SiMYB067	4e-56
16- 2:	PgMYB114	SiMYB061	0
16- 3:	PgMYB137	SiMYB060	7e-55
16- 4:	PgMYB138	SiMYB052	0
16- 5:	PgMYB139	SiMYB051	1e-154
## Alignment 17: score=273.0 e_value=1.4e-12 N=6 Pg3&Si4 plus
17- 0:	PgMYB102	SiMYB080	5e-95
17- 1:	PgMYB105	SiMYB081	2e-52
17- 2:	PgMYB111	SiMYB089	0
17- 3:	PgMYB118	SiMYB094	3e-18
17- 4:	PgMYB131	SiMYB097	9e-31
17- 5:	PgMYB132	SiMYB098	5e-31
## Alignment 18: score=271.0 e_value=9.5e-14 N=6 Pg3&Si4 minus
18- 0:	PgMYB101	SiMYB100	2e-47
18- 1:	PgMYB102	SiMYB098	2e-100
18- 2:	PgMYB103	SiMYB097	5e-30
18- 3:	PgMYB118	SiMYB094	3e-18
18- 4:	PgMYB130	SiMYB085	1e-57
18- 5:	PgMYB133	SiMYB081	4e-74
## Alignment 19: score=590.0 e_value=2.7e-32 N=12 Pg3&Si7 plus
19- 0:	PgMYB115	SiMYB157	3e-63
19- 1:	PgMYB117	SiMYB158	3e-100
19- 2:	PgMYB118	SiMYB160	0
19- 3:	PgMYB123	SiMYB161	6e-126
19- 4:	PgMYB124	SiMYB162	1e-146
19- 5:	PgMYB126	SiMYB163	3e-90
19- 6:	PgMYB129	SiMYB164	0
19- 7:	PgMYB131	SiMYB165	2e-180
19- 8:	PgMYB132	SiMYB166	0
19- 9:	PgMYB133	SiMYB167	8e-106
19- 10:	PgMYB134	SiMYB168	3e-173
19- 11:	PgMYB135	SiMYB169	0
## Alignment 20: score=285.0 e_value=3.4e-09 N=6 Pg3&Si7 plus
20- 0:	PgMYB93	SiMYB157	2e-78
20- 1:	PgMYB96	SiMYB158	6e-81
20- 2:	PgMYB100	SiMYB162	5e-68
20- 3:	PgMYB103	SiMYB165	2e-64
20- 4:	PgMYB107	SiMYB168	1e-61
20- 5:	PgMYB112	SiMYB174	4e-36
## Alignment 21: score=338.0 e_value=1e-11 N=7 Pg3&Si7 minus
21- 0:	PgMYB94	SiMYB169	9e-124
21- 1:	PgMYB100	SiMYB168	5e-104
21- 2:	PgMYB101	SiMYB166	1e-103
21- 3:	PgMYB106	SiMYB163	1e-83
21- 4:	PgMYB107	SiMYB162	8e-91
21- 5:	PgMYB108	SiMYB161	1e-93
21- 6:	PgMYB109	SiMYB158	3e-95
## Alignment 22: score=359.0 e_value=1.5e-16 N=8 Pg3&Si9 plus
22- 0:	PgMYB93	SiMYB181	2e-80
22- 1:	PgMYB99	SiMYB182	4e-34
22- 2:	PgMYB102	SiMYB186	8e-33
22- 3:	PgMYB107	SiMYB192	1e-73
22- 4:	PgMYB112	SiMYB198	2e-34
22- 5:	PgMYB130	SiMYB199	1e-46
22- 6:	PgMYB135	SiMYB203	1e-51
22- 7:	PgMYB137	SiMYB206	2e-81
## Alignment 23: score=280.0 e_value=3.7e-09 N=6 Pg3&Si9 minus
23- 0:	PgMYB112	SiMYB209	3e-33
23- 1:	PgMYB116	SiMYB206	6e-13
23- 2:	PgMYB123	SiMYB204	3e-51
23- 3:	PgMYB126	SiMYB201	3e-56
23- 4:	PgMYB131	SiMYB198	2e-30
23- 5:	PgMYB134	SiMYB192	9e-67
## Alignment 24: score=286.0 e_value=7.2e-11 N=6 Pg4&Si3 plus
24- 0:	PgMYB140	SiMYB070	7e-12
24- 1:	PgMYB145	SiMYB074	0
24- 2:	PgMYB146	SiMYB075	1e-129
24- 3:	PgMYB147	SiMYB076	0
24- 4:	PgMYB153	SiMYB078	1e-33
24- 5:	PgMYB159	SiMYB079	7e-37
## Alignment 25: score=281.0 e_value=5.6e-11 N=6 Pg4&Si3 minus
25- 0:	PgMYB141	SiMYB078	5e-55
25- 1:	PgMYB142	SiMYB077	7e-110
25- 2:	PgMYB145	SiMYB074	0
25- 3:	PgMYB147	SiMYB067	2e-60
25- 4:	PgMYB148	SiMYB062	1e-41
25- 5:	PgMYB156	SiMYB054	1e-39
## Alignment 26: score=325.0 e_value=2.3e-11 N=7 Pg4&Si5 plus
26- 0:	PgMYB140	SiMYB102	3e-14
26- 1:	PgMYB142	SiMYB113	1e-36
26- 2:	PgMYB147	SiMYB118	6e-59
26- 3:	PgMYB150	SiMYB120	4e-32
26- 4:	PgMYB155	SiMYB124	1e-72
26- 5:	PgMYB156	SiMYB130	4e-39
26- 6:	PgMYB157	SiMYB131	8e-15
## Alignment 27: score=268.0 e_value=7.1e-12 N=6 Pg4&Si5 minus
27- 0:	PgMYB140	SiMYB131	6e-14
27- 1:	PgMYB144	SiMYB130	8e-24
27- 2:	PgMYB147	SiMYB128	9e-59
27- 3:	PgMYB148	SiMYB116	4e-43
27- 4:	PgMYB149	SiMYB106	5e-66
27- 5:	PgMYB157	SiMYB102	2e-17
## Alignment 28: score=275.0 e_value=4.5e-11 N=6 Pg4&Si9 minus
28- 0:	PgMYB140	SiMYB206	6e-12
28- 1:	PgMYB146	SiMYB204	7e-83
28- 2:	PgMYB148	SiMYB196	1e-50
28- 3:	PgMYB150	SiMYB195	2e-31
28- 4:	PgMYB153	SiMYB182	3e-33
28- 5:	PgMYB154	SiMYB181	2e-78
## Alignment 29: score=277.0 e_value=2.1e-10 N=6 Pg5&Si1 plus
29- 0:	PgMYB170	SiMYB003	7e-27
29- 1:	PgMYB171	SiMYB004	2e-115
29- 2:	PgMYB174	SiMYB005	7e-131
29- 3:	PgMYB178	SiMYB006	1e-166
29- 4:	PgMYB189	SiMYB013	2e-61
29- 5:	PgMYB195	SiMYB022	9e-51
## Alignment 30: score=327.0 e_value=3.2e-15 N=7 Pg5&Si1 minus
30- 0:	PgMYB171	SiMYB024	8e-91
30- 1:	PgMYB175	SiMYB017	8e-114
30- 2:	PgMYB176	SiMYB016	2e-31
30- 3:	PgMYB177	SiMYB015	4e-48
30- 4:	PgMYB186	SiMYB005	6e-66
30- 5:	PgMYB193	SiMYB004	2e-99
30- 6:	PgMYB196	SiMYB002	5e-30
## Alignment 31: score=431.0 e_value=4.4e-22 N=9 Pg5&Si2 plus
31- 0:	PgMYB169	SiMYB025	1e-31
31- 1:	PgMYB172	SiMYB028	2e-94
31- 2:	PgMYB174	SiMYB032	4e-57
31- 3:	PgMYB178	SiMYB033	7e-55
31- 4:	PgMYB183	SiMYB042	5e-59
31- 5:	PgMYB184	SiMYB046	2e-76
31- 6:	PgMYB185	SiMYB047	2e-68
31- 7:	PgMYB186	SiMYB048	3e-137
31- 8:	PgMYB187	SiMYB049	1e-96
## Alignment 32: score=275.0 e_value=1.8e-09 N=6 Pg5&Si3 plus
32- 0:	PgMYB167	SiMYB053	4e-31
32- 1:	PgMYB172	SiMYB056	7e-98
32- 2:	PgMYB180	SiMYB063	1e-37
32- 3:	PgMYB186	SiMYB069	4e-106
32- 4:	PgMYB187	SiMYB075	1e-84
32- 5:	PgMYB192	SiMYB079	9e-35
## Alignment 33: score=279.0 e_value=1.1e-10 N=6 Pg5&Si3 minus
33- 0:	PgMYB169	SiMYB077	5e-30
33- 1:	PgMYB178	SiMYB068	8e-59
33- 2:	PgMYB180	SiMYB063	1e-37
33- 3:	PgMYB185	SiMYB055	6e-65
33- 4:	PgMYB187	SiMYB054	4e-94
33- 5:	PgMYB188	SiMYB052	4e-55
## Alignment 34: score=280.0 e_value=5.7e-10 N=6 Pg5&Si4 minus
34- 0:	PgMYB168	SiMYB095	7e-151
34- 1:	PgMYB170	SiMYB094	0
34- 2:	PgMYB172	SiMYB092	7e-172
34- 3:	PgMYB174	SiMYB090	0
34- 4:	PgMYB183	SiMYB085	4e-65
34- 5:	PgMYB193	SiMYB082	7e-101
## Alignment 35: score=317.0 e_value=1.7e-13 N=7 Pg5&Si5 minus
35- 0:	PgMYB170	SiMYB138	3e-54
35- 1:	PgMYB177	SiMYB130	5e-64
35- 2:	PgMYB180	SiMYB116	6e-37
35- 3:	PgMYB181	SiMYB114	8e-73
35- 4:	PgMYB185	SiMYB106	2e-63
35- 5:	PgMYB189	SiMYB104	9e-74
35- 6:	PgMYB192	SiMYB102	4e-29
## Alignment 36: score=883.0 e_value=1.2e-50 N=18 Pg5&Si9 plus
36- 0:	PgMYB169	SiMYB183	2e-31
36- 1:	PgMYB170	SiMYB185	0
36- 2:	PgMYB175	SiMYB186	5e-31
36- 3:	PgMYB177	SiMYB190	2e-69
36- 4:	PgMYB179	SiMYB193	5e-14
36- 5:	PgMYB180	SiMYB195	2e-166
36- 6:	PgMYB181	SiMYB196	0
36- 7:	PgMYB182	SiMYB198	8e-85
36- 8:	PgMYB183	SiMYB199	7e-133
36- 9:	PgMYB184	SiMYB200	4e-89
36- 10:	PgMYB185	SiMYB201	9e-74
36- 11:	PgMYB186	SiMYB203	0
36- 12:	PgMYB187	SiMYB204	0
36- 13:	PgMYB189	SiMYB205	1e-179
36- 14:	PgMYB192	SiMYB206	1e-138
36- 15:	PgMYB193	SiMYB207	0
36- 16:	PgMYB195	SiMYB208	3e-130
36- 17:	PgMYB196	SiMYB209	2e-130
## Alignment 37: score=369.0 e_value=6.2e-16 N=8 Pg6&Si3 plus
37- 0:	PgMYB200	SiMYB054	3e-54
37- 1:	PgMYB206	SiMYB061	1e-35
37- 2:	PgMYB218	SiMYB064	2e-30
37- 3:	PgMYB219	SiMYB065	2e-51
37- 4:	PgMYB224	SiMYB067	2e-87
37- 5:	PgMYB228	SiMYB071	6e-44
37- 6:	PgMYB233	SiMYB075	9e-75
37- 7:	PgMYB237	SiMYB076	5e-35
## Alignment 38: score=321.0 e_value=3.3e-13 N=7 Pg6&Si3 minus
38- 0:	PgMYB201	SiMYB071	1e-16
38- 1:	PgMYB206	SiMYB070	2e-32
38- 2:	PgMYB215	SiMYB067	3e-127
38- 3:	PgMYB217	SiMYB066	1e-75
38- 4:	PgMYB229	SiMYB055	0
38- 5:	PgMYB233	SiMYB054	5e-80
38- 6:	PgMYB234	SiMYB051	2e-52
## Alignment 39: score=319.0 e_value=3.1e-16 N=7 Pg6&Si3 minus
39- 0:	PgMYB208	SiMYB079	2e-44
39- 1:	PgMYB218	SiMYB071	7e-15
39- 2:	PgMYB230	SiMYB070	3e-26
39- 3:	PgMYB237	SiMYB067	8e-35
39- 4:	PgMYB240	SiMYB066	8e-69
39- 5:	PgMYB241	SiMYB062	3e-90
39- 6:	PgMYB242	SiMYB061	2e-15
## Alignment 40: score=713.0 e_value=2.9e-56 N=15 Pg6&Si5 plus
40- 0:	PgMYB206	SiMYB102	8e-36
40- 1:	PgMYB225	SiMYB103	2e-88
40- 2:	PgMYB226	SiMYB104	0
40- 3:	PgMYB227	SiMYB105	0
40- 4:	PgMYB229	SiMYB106	0
40- 5:	PgMYB233	SiMYB107	8e-107
40- 6:	PgMYB234	SiMYB108	0
40- 7:	PgMYB235	SiMYB109	3e-135
40- 8:	PgMYB236	SiMYB110	0
40- 9:	PgMYB237	SiMYB111	1e-109
40- 10:	PgMYB238	SiMYB112	2e-139
40- 11:	PgMYB239	SiMYB114	2e-171
40- 12:	PgMYB240	SiMYB115	6e-101
40- 13:	PgMYB241	SiMYB116	4e-121
40- 14:	PgMYB242	SiMYB131	2e-15
## Alignment 41: score=375.0 e_value=8.8e-18 N=8 Pg6&Si5 plus
41- 0:	PgMYB213	SiMYB106	3e-70
41- 1:	PgMYB214	SiMYB110	7e-39
41- 2:	PgMYB215	SiMYB118	2e-87
41- 3:	PgMYB218	SiMYB121	2e-28
41- 4:	PgMYB219	SiMYB122	3e-71
41- 5:	PgMYB224	SiMYB126	1e-79
41- 6:	PgMYB232	SiMYB131	5e-33
41- 7:	PgMYB234	SiMYB134	2e-72
## Alignment 42: score=271.0 e_value=2.2e-09 N=6 Pg6&Si5 plus
42- 0:	PgMYB201	SiMYB108	2e-15
42- 1:	PgMYB207	SiMYB117	1e-48
42- 2:	PgMYB212	SiMYB124	1e-67
42- 3:	PgMYB216	SiMYB125	1e-100
42- 4:	PgMYB222	SiMYB127	7e-36
42- 5:	PgMYB230	SiMYB133	1e-30
## Alignment 43: score=569.0 e_value=9.2e-30 N=12 Pg6&Si5 minus
43- 0:	PgMYB199	SiMYB139	5e-57
43- 1:	PgMYB203	SiMYB137	0
43- 2:	PgMYB205	SiMYB134	2e-26
43- 3:	PgMYB209	SiMYB132	1e-60
43- 4:	PgMYB211	SiMYB130	0
43- 5:	PgMYB213	SiMYB128	0
43- 6:	PgMYB214	SiMYB127	6e-162
43- 7:	PgMYB215	SiMYB126	0
43- 8:	PgMYB222	SiMYB119	3e-170
43- 9:	PgMYB224	SiMYB118	0
43- 10:	PgMYB228	SiMYB108	3e-43
43- 11:	PgMYB230	SiMYB102	7e-26
## Alignment 44: score=253.0 e_value=6.3e-12 N=6 Pg6&Si5 minus
44- 0:	PgMYB209	SiMYB139	7e-27
44- 1:	PgMYB218	SiMYB134	5e-15
44- 2:	PgMYB236	SiMYB127	2e-42
44- 3:	PgMYB237	SiMYB125	1e-34
44- 4:	PgMYB239	SiMYB120	3e-36
44- 5:	PgMYB242	SiMYB102	1e-15
## Alignment 45: score=532.0 e_value=1.3e-26 N=11 Pg7&Si2 minus
45- 0:	PgMYB243	SiMYB049	6e-99
45- 1:	PgMYB244	SiMYB048	3e-97
45- 2:	PgMYB245	SiMYB047	0
45- 3:	PgMYB246	SiMYB046	1e-99
45- 4:	PgMYB249	SiMYB045	2e-94
45- 5:	PgMYB251	SiMYB044	0
45- 6:	PgMYB252	SiMYB042	3e-165
45- 7:	PgMYB253	SiMYB037	4e-85
45- 8:	PgMYB254	SiMYB033	0
45- 9:	PgMYB260	SiMYB030	0
45- 10:	PgMYB261	SiMYB027	1e-116

## Sheet: A. thaliana
List of collinear pairs between PgMYB and AtMYB
# Number of collinear genes: 205, Percentage: 48.81
# Number of all genes: 420
## Alignment 0: score=261.0 e_value=2.7e-08 N=6 AT1&Pg1 plus
0- 0:	AtMYB60	PgMYB4	2e-84
0- 1:	AtMYB52	PgMYB7	3e-60
0- 2:	AtMYB3	PgMYB14	4e-56
0- 3:	AT1G49010.1	PgMYB27	9e-16
0- 4:	AtMYB50	PgMYB34	6e-89
0- 5:	ATMYB31	PgMYB45	1e-81
## Alignment 1: score=405.0 e_value=5.1e-20 N=9 AT1&Pg1 minus
1- 0:	AtMYB60	PgMYB45	2e-85
1- 1:	AtMYB3	PgMYB43	2e-86
1- 2:	AtMYB93	PgMYB40	4e-13
1- 3:	AtMYB112	PgMYB28	2e-56
1- 4:	AT1G49010.1	PgMYB27	9e-16
1- 5:	AtMYB50	PgMYB25	3e-43
1- 6:	AtMYB20	PgMYB9	6e-93
1- 7:	AtMYB105	PgMYB7	1e-72
1- 8:	ATMYB31	PgMYB4	4e-77
## Alignment 2: score=277.0 e_value=3.4e-09 N=6 AT1&Pg3 minus
2- 0:	ATMYB13	PgMYB124	2e-74
2- 1:	AtMYBCDC5	PgMYB116	0
2- 2:	AtMYB116	PgMYB108	1e-54
2- 3:	AtMYB93	PgMYB105	9e-49
2- 4:	AtMYB72	PgMYB100	4e-67
2- 5:	AtMYB20	PgMYB97	1e-84
## Alignment 3: score=277.0 e_value=9.2e-09 N=6 AT1&Pg4 plus
3- 0:	AtMYBCDC5	PgMYB140	0
3- 1:	AtMYB93	PgMYB143	5e-66
3- 2:	AtMYB112	PgMYB146	2e-77
3- 3:	AtMYB50	PgMYB147	7e-60
3- 4:	AtMYB103	PgMYB149	2e-87
3- 5:	AtMYB105	PgMYB159	4e-66
## Alignment 4: score=277.0 e_value=2.1e-11 N=6 AT1&Pg4 plus
4- 0:	AtMYB60	PgMYB144	4e-25
4- 1:	AtMYB61	PgMYB147	1e-60
4- 2:	AtMYBCDC5	PgMYB157	8e-91
4- 3:	AtMYB52	PgMYB159	1e-67
4- 4:	AtMYB3	PgMYB160	3e-81
4- 5:	AtMYB50	PgMYB162	1e-46
## Alignment 5: score=280.0 e_value=4.2e-10 N=6 AT1&Pg6 minus
5- 0:	AtMYB61	PgMYB238	9e-62
5- 1:	AtMYB52	PgMYB230	8e-47
5- 2:	AtMYB3	PgMYB226	5e-62
5- 3:	AtMYB112	PgMYB219	1e-50
5- 4:	AT1G49010.1	PgMYB218	2e-17
5- 5:	AtMYB50	PgMYB213	1e-70
## Alignment 6: score=331.0 e_value=2.7e-13 N=7 AT2&Pg6 plus
6- 0:	AtMYB7	PgMYB204	3e-56
6- 1:	AtMYB70	PgMYB208	5e-51
6- 2:	AtMYB101	PgMYB211	4e-70
6- 3:	AtMYB38	PgMYB212	3e-67
6- 4:	AT2G38090.1	PgMYB218	2e-17
6- 5:	AtMYB2	PgMYB219	2e-48
6- 6:	AtMYB12	PgMYB226	4e-72
## Alignment 7: score=267.0 e_value=3.2e-09 N=6 AT3&Pg1 plus
7- 0:	AtMYB106	PgMYB8	3e-109
7- 1:	AtMYB3R3	PgMYB19	9e-93
7- 2:	AT3G11280.1	PgMYB27	4e-16
7- 3:	AtMYB67	PgMYB34	4e-69
7- 4:	AtMYB71	PgMYB39	6e-50
7- 5:	AtMYB30	PgMYB45	8e-87
## Alignment 8: score=258.0 e_value=9.7e-12 N=6 AT3&Pg1 plus
8- 0:	AtMYB108	PgMYB2	5e-74
8- 1:	AT3G11280.1	PgMYB15	9e-30
8- 2:	AtMYB118	PgMYB17	3e-17
8- 3:	AtMYB21	PgMYB28	2e-70
8- 4:	AtMYB48	PgMYB38	1e-61
8- 5:	AT3G50060.1	PgMYB40	2e-13
## Alignment 9: score=271.0 e_value=1.3e-08 N=6 AT3&Pg2 minus
9- 0:	AtMYB1	PgMYB79	7e-26
9- 1:	AT3G11280.1	PgMYB76	6e-22
9- 2:	AtMYB5	PgMYB73	8e-59
9- 3:	AtMYB15	PgMYB60	1e-52
9- 4:	AtMYB118	PgMYB56	3e-43
9- 5:	AtMYB84	PgMYB47	3e-82
## Alignment 10: score=363.0 e_value=2.7e-15 N=8 AT3&Pg3 plus
10- 0:	AtMYB107	PgMYB96	3e-88
10- 1:	AT3G11280.1	PgMYB98	3e-15
10- 2:	AtMYB15	PgMYB107	5e-79
10- 3:	AtMYB71	PgMYB108	4e-69
10- 4:	AtMYB35	PgMYB115	1e-67
10- 5:	AtMYB121	PgMYB123	7e-65
10- 6:	AtMYB45	PgMYB126	7e-58
10- 7:	AT3G50060.1	PgMYB137	3e-22
## Alignment 11: score=320.0 e_value=3.6e-15 N=7 AT3&Pg3 minus
11- 0:	AtMYB107	PgMYB133	5e-72
11- 1:	AtMYB65	PgMYB129	7e-40
11- 2:	AtMYB15	PgMYB124	2e-80
11- 3:	AtMYB71	PgMYB123	9e-66
11- 4:	AtMYB121	PgMYB108	7e-65
11- 5:	AtMYB45	PgMYB106	2e-58
11- 6:	AtMYB17	PgMYB105	9e-50
## Alignment 12: score=286.0 e_value=7.5e-12 N=6 AT3&Pg4 plus
12- 0:	AtMYB107	PgMYB143	6e-66
12- 1:	AtMYB108	PgMYB146	2e-73
12- 2:	AtMYB83	PgMYB147	2e-67
12- 3:	AT3G11280.1	PgMYB148	2e-31
12- 4:	AtMYB26	PgMYB149	8e-66
12- 5:	AtMYB21	PgMYB156	9e-41
## Alignment 13: score=465.0 e_value=6.4e-24 N=10 AT3&Pg6 plus
13- 0:	AtMYB57	PgMYB200	2e-56
13- 1:	AtMYB1	PgMYB208	9e-76
13- 2:	AtMYB3R3	PgMYB210	7e-81
13- 3:	AtMYB65	PgMYB211	7e-87
13- 4:	AtMYB67	PgMYB213	1e-73
13- 5:	AtMYB5	PgMYB216	4e-62
13- 6:	AtMYB21	PgMYB219	2e-53
13- 7:	AtMYB0	PgMYB220	1e-14
13- 8:	AtMYB110	PgMYB230	3e-49
13- 9:	AtMYB84	PgMYB240	5e-66
## Alignment 14: score=328.0 e_value=7.1e-12 N=7 AT4&Pg3 plus
14- 0:	AtMYB3R2	PgMYB114	1e-45
14- 1:	AtMYB74	PgMYB119	1e-66
14- 2:	AtMYB79	PgMYB123	2e-68
14- 3:	AtMYB18	PgMYB126	3e-60
14- 4:	AtMYB97	PgMYB129	4e-43
14- 5:	AtMYB32	PgMYB130	2e-42
14- 6:	AtMYB73	PgMYB137	3e-21
## Alignment 15: score=409.0 e_value=1.5e-18 N=9 AT5&Pg1 plus
15- 0:	AT5G01200.1	PgMYB11	3e-25
15- 1:	AT5G05790.1	PgMYB16	3e-29
15- 2:	AtMYB64	PgMYB17	1e-16
15- 3:	AtMYB3R4	PgMYB19	1e-82
15- 4:	AtMYB86	PgMYB25	6e-45
15- 5:	AtMYB24	PgMYB28	4e-65
15- 6:	AtMYB78	PgMYB35	1e-70
15- 7:	AtMYB59	PgMYB38	1e-61
15- 8:	AtMYB96	PgMYB45	6e-82
## Alignment 16: score=309.0 e_value=2.9e-16 N=7 AT5&Pg1 minus
16- 0:	AT5G01200.1	PgMYB32	8e-32
16- 1:	AT5G04760.1	PgMYB27	1e-19
16- 2:	AtMYB40	PgMYB9	4e-76
16- 3:	AtMYB16	PgMYB8	4e-112
16- 4:	AtMYB56	PgMYB7	4e-61
16- 5:	AtMYB78	PgMYB2	1e-73
16- 6:	AtMYB59	PgMYB1	3e-78
## Alignment 17: score=264.0 e_value=7e-09 N=6 AT5&Pg2 plus
17- 0:	AtMYB64	PgMYB46	9e-55
17- 1:	AtMYB56	PgMYB51	1e-61
17- 2:	AtMYB115	PgMYB56	1e-40
17- 3:	AtMYB120	PgMYB58	2e-66
17- 4:	AtMYB36	PgMYB59	9e-44
17- 5:	AtMYB53	PgMYB75	7e-82
## Alignment 18: score=318.0 e_value=6.9e-13 N=7 AT5&Pg2 minus
18- 0:	AtMYB3R4	PgMYB79	3e-33
18- 1:	AtMYB43	PgMYB77	2e-80
18- 2:	AtMYB9	PgMYB75	1e-91
18- 3:	AtMYB123	PgMYB73	1e-58
18- 4:	AtMYB36	PgMYB59	9e-44
18- 5:	AtMYB119	PgMYB56	2e-41
18- 6:	AtMYB68	PgMYB47	4e-81
## Alignment 19: score=318.0 e_value=6.9e-12 N=7 AT5&Pg2 minus
19- 0:	AtMYB3R5	PgMYB79	4e-28
19- 1:	AT5G05790.1	PgMYB76	3e-22
19- 2:	AtMYB92	PgMYB75	4e-95
19- 3:	AtMYB9	PgMYB68	4e-84
19- 4:	AtMYB115	PgMYB56	1e-40
19- 5:	AtMYB36	PgMYB47	4e-83
19- 6:	AtMYB119	PgMYB46	2e-58
## Alignment 20: score=355.0 e_value=1.2e-15 N=8 AT5&Pg3 plus
20- 0:	AtMYB92	PgMYB96	3e-98
20- 1:	AtMYB43	PgMYB97	6e-82
20- 2:	AT5G23650.1	PgMYB98	3e-11
20- 3:	AtMYB19	PgMYB106	4e-58
20- 4:	AtMYB80	PgMYB115	4e-68
20- 5:	AtMYB59	PgMYB123	8e-54
20- 6:	AtMYB28	PgMYB130	2e-42
20- 7:	AtMYB44	PgMYB137	5e-22
## Alignment 21: score=259.0 e_value=3.1e-12 N=6 AT5&Pg3 plus
21- 0:	AT5G04760.1	PgMYB98	3e-12
21- 1:	AtMYB3R4	PgMYB114	1e-73
21- 2:	AtMYB16	PgMYB115	1e-62
21- 3:	AtMYB9	PgMYB125	6e-65
21- 4:	AtMYB19	PgMYB126	1e-58
21- 5:	AtMYB120	PgMYB129	8e-42
## Alignment 22: score=398.0 e_value=7.5e-20 N=9 AT5&Pg3 minus
22- 0:	AT5G04760.1	PgMYB139	3e-57
22- 1:	AtMYB33	PgMYB129	2e-39
22- 2:	AtMYB92	PgMYB125	1e-65
22- 3:	AtMYB3R4	PgMYB114	1e-73
22- 4:	AtMYB16	PgMYB109	2e-90
22- 5:	AtMYB86	PgMYB106	6e-55
22- 6:	AtMYB99	PgMYB97	2e-72
22- 7:	AtMYB53	PgMYB96	1e-88
22- 8:	AtMYB68	PgMYB93	8e-79
## Alignment 23: score=285.0 e_value=1.9e-10 N=6 AT5&Pg4 plus
23- 0:	AT5G01200.1	PgMYB148	4e-33
23- 1:	AT5G04760.1	PgMYB150	3e-27
23- 2:	AtMYB66	PgMYB157	4e-17
23- 3:	AtMYB9	PgMYB158	1e-86
23- 4:	AtMYB56	PgMYB159	3e-64
23- 5:	AtMYB86	PgMYB162	2e-46
## Alignment 24: score=330.0 e_value=1.1e-12 N=7 AT5&Pg4 minus
24- 0:	AtMYB46	PgMYB162	5e-47
24- 1:	AtMYB40	PgMYB161	7e-71
24- 2:	AtMYB9	PgMYB158	1e-86
24- 3:	AtMYB37	PgMYB155	1e-73
24- 4:	AtMYB86	PgMYB147	1e-59
24- 5:	AtMYB78	PgMYB146	9e-73
24- 6:	AtMYB82	PgMYB144	5e-26
## Alignment 25: score=261.0 e_value=2.8e-08 N=6 AT5&Pg5 plus
25- 0:	AT5G01200.1	PgMYB172	1e-22
25- 1:	AtMYB33	PgMYB177	1e-63
25- 2:	AT5G08520.1	PgMYB180	1e-29
25- 3:	AtMYB123	PgMYB183	3e-63
25- 4:	AtMYB78	PgMYB187	4e-83
25- 5:	AtMYB44	PgMYB192	2e-37
## Alignment 26: score=408.0 e_value=9.4e-19 N=9 AT5&Pg6 plus
26- 0:	AT5G04760.1	PgMYB201	7e-19
26- 1:	AtMYB64	PgMYB206	4e-41
26- 2:	AtMYB3R4	PgMYB210	2e-69
26- 3:	AtMYB37	PgMYB212	1e-66
26- 4:	AtMYB86	PgMYB213	1e-71
26- 5:	AtMYB24	PgMYB219	1e-52
26- 6:	AtMYB111	PgMYB226	2e-70
26- 7:	AtMYB36	PgMYB240	2e-67
26- 8:	AtMYB119	PgMYB242	2e-17
## Alignment 27: score=271.0 e_value=4.7e-09 N=6 AT5&Pg6 plus
27- 0:	AT5G01200.1	PgMYB205	1e-23
27- 1:	AtMYB3R5	PgMYB210	1e-89
27- 2:	AtMYB33	PgMYB211	1e-93
27- 3:	AtMYB66	PgMYB220	7e-15
27- 4:	AtMYB56	PgMYB230	4e-54
27- 5:	AtMYB86	PgMYB237	1e-34
## Alignment 28: score=365.0 e_value=6.7e-15 N=8 AT5&Pg6 minus
28- 0:	AT5G01200.1	PgMYB241	3e-34
28- 1:	AT5G04760.1	PgMYB239	2e-29
28- 2:	AtMYB46	PgMYB237	1e-34
28- 3:	AtMYB86	PgMYB224	2e-73
28- 4:	AtMYB23	PgMYB220	3e-14
28- 5:	AtMYB111	PgMYB216	2e-57
28- 6:	AtMYB120	PgMYB211	4e-66
28- 7:	AtMYB119	PgMYB206	4e-41
## Alignment 29: score=327.0 e_value=1.8e-12 N=7 AT5&Pg7 minus
29- 0:	AtMYB3R5	PgMYB259	9e-29
29- 1:	AT5G04760.1	PgMYB256	1e-23
29- 2:	AT5G08520.1	PgMYB255	2e-19
29- 3:	AtMYB40	PgMYB253	4e-76
29- 4:	AtMYB9	PgMYB249	4e-76
29- 5:	AtMYB86	PgMYB245	3e-76
29- 6:	AtMYB78	PgMYB243	4e-69

## Sheet: O. sativa
List of collinear pairs between PgMYB and OsMYB
# Number of collinear genes: 111, Percentage: 28.24
# Number of all genes: 393
## Alignment 0: score=269.0 e_value=4.3e-09 N=6 Os1&Pg1 plus
0- 0:	OsMYB2	PgMYB11	1e-23
0- 1:	OsMYB5	PgMYB19	1e-76
0- 2:	OsMYB7	PgMYB25	6e-46
0- 3:	OsMYB11	PgMYB28	1e-63
0- 4:	OsMYB18	PgMYB41	3e-75
0- 5:	OsMYB22	PgMYB43	7e-90
## Alignment 1: score=315.0 e_value=2.9e-13 N=7 Os1&Pg1 minus
1- 0:	OsMYB5	PgMYB41	0
1- 1:	OsMYB7	PgMYB34	0
1- 2:	OsMYB12	PgMYB26	1e-79
1- 3:	OsMYB18	PgMYB19	3e-177
1- 4:	OsMYB21	PgMYB17	8e-15
1- 5:	OsMYB22	PgMYB14	3e-62
1- 6:	OsMYB23	PgMYB1	3e-59
## Alignment 2: score=323.0 e_value=3.5e-12 N=7 Os1&Pg6 plus
2- 0:	OsMYB2	PgMYB201	2e-15
2- 1:	OsMYB5	PgMYB210	3e-68
2- 2:	OsMYB7	PgMYB213	2e-70
2- 3:	OsMYB10	PgMYB215	2e-83
2- 4:	OsMYB13	PgMYB216	4e-75
2- 5:	OsMYB20	PgMYB218	4e-14
2- 6:	OsMYB22	PgMYB226	2e-62
## Alignment 3: score=278.0 e_value=1.4e-11 N=6 Os1&Pg6 plus
3- 0:	OsMYB2	PgMYB218	1e-13
3- 1:	OsMYB7	PgMYB224	1e-73
3- 2:	OsMYB9	PgMYB226	4e-112
3- 3:	OsMYB10	PgMYB237	5e-35
3- 4:	OsMYB14	PgMYB238	8e-64
3- 5:	OsMYB18	PgMYB242	5e-16
## Alignment 4: score=530.0 e_value=8.9e-27 N=11 Os1&Pg6 minus
4- 0:	OsMYB2	PgMYB234	2e-149
4- 1:	OsMYB6	PgMYB230	1e-58
4- 2:	OsMYB8	PgMYB227	2e-100
4- 3:	OsMYB9	PgMYB226	4e-112
4- 4:	OsMYB11	PgMYB219	1e-64
4- 5:	OsMYB15	PgMYB213	4e-140
4- 6:	OsMYB17	PgMYB211	0
4- 7:	OsMYB18	PgMYB210	0
4- 8:	OsMYB19	PgMYB208	9e-172
4- 9:	OsMYB21	PgMYB206	3e-71
4- 10:	OsMYB22	PgMYB204	5e-63
## Alignment 5: score=374.0 e_value=2.3e-18 N=8 Os2&Pg3 minus
5- 0:	OsMYB25	PgMYB126	7e-76
5- 1:	OsMYB28	PgMYB109	3e-96
5- 2:	OsMYB29	PgMYB108	3e-118
5- 3:	OsMYB30	PgMYB107	8e-109
5- 4:	OsMYB32	PgMYB105	5e-60
5- 5:	OsMYB35	PgMYB97	2e-90
5- 6:	OsMYB36	PgMYB96	6e-131
5- 7:	OsMYB37	PgMYB93	5e-85
## Alignment 6: score=388.0 e_value=5.3e-15 N=8 Os3&Pg5 minus
6- 0:	OsMYB38	PgMYB195	2e-98
6- 1:	OsMYB39	PgMYB192	3e-49
6- 2:	OsMYB41	PgMYB189	1e-118
6- 3:	OsMYB42	PgMYB187	7e-157
6- 4:	OsMYB43	PgMYB185	2e-67
6- 5:	OsMYB44	PgMYB184	9e-78
6- 6:	OsMYB46	PgMYB183	6e-80
6- 7:	OsMYB47	PgMYB177	4e-65
## Alignment 7: score=288.0 e_value=5.5e-10 N=6 Os4&Pg3 plus
7- 0:	OsMYB50	PgMYB116	0
7- 1:	OsMYB54	PgMYB123	2e-111
7- 2:	OsMYB55	PgMYB124	4e-110
7- 3:	OsMYB56	PgMYB126	1e-84
7- 4:	OsMYB58	PgMYB129	6e-111
7- 5:	OsMYB59	PgMYB133	8e-99
## Alignment 8: score=294.0 e_value=7.1e-14 N=6 Os4&Pg3 minus
8- 0:	OsMYB50	PgMYB116	0
8- 1:	OsMYB52	PgMYB115	1e-63
8- 2:	OsMYB54	PgMYB108	6e-92
8- 3:	OsMYB55	PgMYB107	2e-95
8- 4:	OsMYB56	PgMYB106	3e-83
8- 5:	OsMYB57	PgMYB105	2e-55
## Alignment 9: score=330.0 e_value=1.6e-13 N=7 Os5&Pg1 plus
9- 0:	OsMYB63	PgMYB2	5e-83
9- 1:	OsMYB65	PgMYB7	8e-40
9- 2:	OsMYB67	PgMYB11	2e-21
9- 3:	OsMYB69	PgMYB19	0
9- 4:	OsMYB71	PgMYB25	5e-100
9- 5:	OsMYB72	PgMYB26	1e-84
9- 6:	OsMYB73	PgMYB28	7e-74
## Alignment 10: score=284.0 e_value=6.3e-11 N=6 Os5&Pg6 plus
10- 0:	OsMYB63	PgMYB219	1e-50
10- 1:	OsMYB64	PgMYB224	5e-75
10- 2:	OsMYB66	PgMYB226	6e-61
10- 3:	OsMYB67	PgMYB234	4e-43
10- 4:	OsMYB71	PgMYB237	7e-35
10- 5:	OsMYB72	PgMYB240	4e-71
## Alignment 11: score=329.0 e_value=2.6e-13 N=7 Os5&Pg6 minus
11- 0:	OsMYB63	PgMYB227	2e-81
11- 1:	OsMYB64	PgMYB224	5e-75
11- 2:	OsMYB66	PgMYB220	1e-13
11- 3:	OsMYB67	PgMYB218	2e-13
11- 4:	OsMYB71	PgMYB215	4e-123
11- 5:	OsMYB72	PgMYB212	5e-67
11- 6:	OsMYB73	PgMYB200	2e-57

## Sheet: P. glaucum
List of collinear pairs betwee in PgMYB (Segmental Duplications)
# Number of collinear genes: 199, Percentage: 71.33
# Number of all genes: 279						List of collinear pairs between in PgMYB (Tandem Duplications)
## Alignment 0: score=306.0 e_value=1.4e-12 N=7 Pg1&Pg2 plus						PgMYB11	PgMYB12	Pg1	Pg1
0- 0:	PgMYB7	PgMYB51	9e-61			PgMYB12	PgMYB13	Pg1	Pg1
0- 1:	PgMYB10	PgMYB57	3e-27			PgMYB15	PgMYB16	Pg1	Pg1
0- 2:	PgMYB11	PgMYB74	9e-69			PgMYB29	PgMYB30	Pg1	Pg1
0- 3:	PgMYB12	PgMYB76	8e-84			PgMYB32	PgMYB33	Pg1	Pg1
0- 4:	PgMYB19	PgMYB79	6e-28			PgMYB38	PgMYB39	Pg1	Pg1
0- 5:	PgMYB29	PgMYB81	2e-21			PgMYB43	PgMYB44	Pg1	Pg1
0- 6:	PgMYB34	PgMYB89	1e-55			PgMYB62	PgMYB63	Pg2	Pg2
## Alignment 1: score=299.0 e_value=7.9e-17 N=7 Pg1&Pg3 plus						PgMYB63	PgMYB64	Pg2	Pg2
1- 0:	PgMYB8	PgMYB96	3e-78			PgMYB64	PgMYB65	Pg2	Pg2
1- 1:	PgMYB9	PgMYB97	1e-85			PgMYB79	PgMYB80	Pg2	Pg2
1- 2:	PgMYB10	PgMYB99	2e-38			PgMYB101	PgMYB102	Pg3	Pg3
1- 3:	PgMYB20	PgMYB113	0			PgMYB154	PgMYB155	Pg4	Pg4
1- 4:	PgMYB22	PgMYB135	6e-51			PgMYB180	PgMYB181	Pg5	Pg5
1- 5:	PgMYB36	PgMYB136	6e-15			PgMYB201	PgMYB202	Pg6	Pg6
1- 6:	PgMYB40	PgMYB137	2e-50			PgMYB201	PgMYB202	Pg6	Pg6
## Alignment 2: score=307.0 e_value=1.4e-12 N=7 Pg1&Pg3 minus						PgMYB201	PgMYB202	Pg6	Pg6
2- 0:	PgMYB1	PgMYB123	1e-49			PgMYB201	PgMYB202	Pg6	Pg6
2- 1:	PgMYB3	PgMYB122	1e-13			PgMYB255	PgMYB256	Pg7	Pg7
2- 2:	PgMYB8	PgMYB117	3e-92			PgMYB261	PgMYB262	Pg7	Pg7
2- 3:	PgMYB19	PgMYB114	2e-59			PgMYB262	PgMYB263	Pg7	Pg7
2- 4:	PgMYB36	PgMYB110	4e-12			PgMYB275	PgMYB276	scaffold3628	scaffold3628
2- 5:	PgMYB39	PgMYB108	1e-49
2- 6:	PgMYB44	PgMYB97	2e-69
## Alignment 3: score=277.0 e_value=3e-11 N=6 Pg1&Pg4 plus
3- 0:	PgMYB1	PgMYB145	3e-118
3- 1:	PgMYB2	PgMYB146	2e-95
3- 2:	PgMYB7	PgMYB159	1e-63
3- 3:	PgMYB9	PgMYB161	5e-84
3- 4:	PgMYB14	PgMYB164	2e-59
3- 5:	PgMYB21	PgMYB166	2e-147
## Alignment 4: score=331.0 e_value=1.5e-12 N=7 Pg1&Pg5 plus
5	PgMYB22	PgMYB174	3e-55
4- 1:	PgMYB23	PgMYB178	9e-52
4- 2:	PgMYB32	PgMYB180	3e-36
4- 3:	PgMYB33	PgMYB181	1e-47
4- 4:	PgMYB34	PgMYB185	1e-64
4- 5:	PgMYB35	PgMYB187	1e-84
4- 6:	PgMYB40	PgMYB192	2e-51
## Alignment 5: score=477.0 e_value=9.9e-23 N=10 Pg1&Pg6 plus
5- 0:	PgMYB14	PgMYB204	1e-60
5- 1:	PgMYB15	PgMYB205	2e-34
5- 2:	PgMYB19	PgMYB208	2e-41
5- 3:	PgMYB25	PgMYB215	2e-86
5- 4:	PgMYB26	PgMYB217	2e-77
5- 5:	PgMYB27	PgMYB218	6e-36
5- 6:	PgMYB28	PgMYB219	3e-51
5- 7:	PgMYB31	PgMYB223	0
5- 8:	PgMYB34	PgMYB224	2e-74
5- 9:	PgMYB43	PgMYB226	7e-62
## Alignment 6: score=268.0 e_value=1.1e-08 N=6 Pg1&Pg6 minus
6- 0:	PgMYB16	PgMYB234	5e-31
6- 1:	PgMYB18	PgMYB228	6e-43
6- 2:	PgMYB25	PgMYB224	9e-50
6- 3:	PgMYB34	PgMYB213	8e-70
6- 4:	PgMYB41	PgMYB210	7e-67
6- 5:	PgMYB43	PgMYB204	1e-58
## Alignment 7: score=284.0 e_value=6.4e-09 N=6 Pg1&Pg7 plus
7- 0:	PgMYB2	PgMYB243	1e-78
7- 1:	PgMYB4	PgMYB246	3e-73
7- 2:	PgMYB8	PgMYB249	1e-74
7- 3:	PgMYB9	PgMYB253	4e-87
7- 4:	PgMYB11	PgMYB255	3e-63
7- 5:	PgMYB19	PgMYB259	4e-23
## Alignment 8: score=282.0 e_value=6.5e-11 N=6 Pg1&Pg7 minus
8- 0:	PgMYB9	PgMYB261	1e-90
8- 1:	PgMYB14	PgMYB252	6e-59
8- 2:	PgMYB18	PgMYB248	2e-16
8- 3:	PgMYB19	PgMYB247	2e-23
8- 4:	PgMYB22	PgMYB244	2e-35
8- 5:	PgMYB28	PgMYB243	2e-59
## Alignment 9: score=444.0 e_value=3.6e-28 N=10 Pg2&Pg3 plus
9- 0:	PgMYB47	PgMYB93	1e-80
9- 1:	PgMYB48	PgMYB99	6e-36
9- 2:	PgMYB53	PgMYB102	2e-39
9- 3:	PgMYB54	PgMYB112	9e-14
9- 4:	PgMYB56	PgMYB114	5e-38
9- 5:	PgMYB58	PgMYB123	1e-46
9- 6:	PgMYB60	PgMYB124	5e-51
9- 7:	PgMYB75	PgMYB125	3e-66
9- 8:	PgMYB89	PgMYB126	2e-74
9- 9:	PgMYB90	PgMYB128	8e-39
## Alignment 10: score=330.0 e_value=1.8e-12 N=7 Pg2&Pg3 plus
10- 0:	PgMYB71	PgMYB92	0
10- 1:	PgMYB75	PgMYB96	2e-148
10- 2:	PgMYB77	PgMYB97	7e-91
10- 3:	PgMYB81	PgMYB98	4e-25
10- 4:	PgMYB82	PgMYB103	3e-30
10- 5:	PgMYB89	PgMYB106	6e-74
10- 6:	PgMYB90	PgMYB110	1e-11
## Alignment 11: score=263.0 e_value=2.4e-10 N=6 Pg2&Pg3 plus
11- 0:	PgMYB62	PgMYB95	2e-30
11- 1:	PgMYB67	PgMYB102	1e-64
11- 2:	PgMYB68	PgMYB105	4e-51
11- 3:	PgMYB79	PgMYB114	2e-33
11- 4:	PgMYB84	PgMYB120	1e-113
11- 5:	PgMYB87	PgMYB135	2e-50
## Alignment 12: score=359.0 e_value=3.8e-14 N=8 Pg2&Pg3 minus
12- 0:	PgMYB60	PgMYB130	1e-42
12- 1:	PgMYB66	PgMYB122	5e-13
12- 2:	PgMYB75	PgMYB115	6e-63
12- 3:	PgMYB79	PgMYB114	2e-33
12- 4:	PgMYB82	PgMYB112	6e-54
12- 5:	PgMYB86	PgMYB111	2e-21
12- 6:	PgMYB87	PgMYB94	2e-58
12- 7:	PgMYB88	PgMYB91	8e-36
## Alignment 13: score=314.0 e_value=1.1e-13 N=7 Pg2&Pg4 plus
13- 0:	PgMYB48	PgMYB141	3e-34
13- 1:	PgMYB49	PgMYB142	5e-40
13- 2:	PgMYB53	PgMYB151	2e-23
13- 3:	PgMYB59	PgMYB154	3e-46
13- 4:	PgMYB68	PgMYB158	3e-80
13- 5:	PgMYB77	PgMYB161	4e-83
13- 6:	PgMYB85	PgMYB163	1e-35
## Alignment 14: score=409.0 e_value=8.1e-20 N=9 Pg2&Pg5 plus
14- 0:	PgMYB49	PgMYB169	5e-32
14- 1:	PgMYB52	PgMYB170	0
14- 2:	PgMYB53	PgMYB175	2e-37
14- 3:	PgMYB58	PgMYB177	2e-65
14- 4:	PgMYB61	PgMYB179	7e-14
14- 5:	PgMYB71	PgMYB193	8e-97
14- 6:	PgMYB75	PgMYB195	8e-51
14- 7:	PgMYB82	PgMYB196	7e-30
14- 8:	PgMYB90	PgMYB197	2e-40
## Alignment 15: score=261.0 e_value=3.7e-10 N=6 Pg2&Pg5 minus
15- 0:	PgMYB54	PgMYB196	2e-12
15- 1:	PgMYB61	PgMYB193	6e-45
15- 2:	PgMYB67	PgMYB175	7e-98
15- 3:	PgMYB69	PgMYB172	1e-121
15- 4:	PgMYB71	PgMYB171	5e-83
15- 5:	PgMYB85	PgMYB170	5e-26
## Alignment 16: score=260.0 e_value=2.1e-09 N=6 Pg2&Pg6 plus
16- 0:	PgMYB46	PgMYB206	1e-38
16- 1:	PgMYB47	PgMYB212	3e-66
16- 2:	PgMYB55	PgMYB214	4e-39
16- 3:	PgMYB68	PgMYB216	5e-61
16- 4:	PgMYB73	PgMYB220	2e-13
16- 5:	PgMYB86	PgMYB225	4e-20
## Alignment 17: score=299.0 e_value=8.2e-13 N=7 Pg2&Pg6 minus
17- 0:	PgMYB46	PgMYB242	2e-79
17- 1:	PgMYB53	PgMYB235	6e-36
17- 2:	PgMYB55	PgMYB214	4e-39
17- 3:	PgMYB58	PgMYB211	2e-69
17- 4:	PgMYB71	PgMYB203	3e-87
17- 5:	PgMYB81	PgMYB201	3e-20
17- 6:	PgMYB84	PgMYB198	3e-138
## Alignment 18: score=430.0 e_value=3.6e-19 N=9 Pg3&Pg3 minus
18- 0:	PgMYB94	PgMYB135	1e-118
18- 1:	PgMYB96	PgMYB133	4e-70
18- 2:	PgMYB101	PgMYB132	4e-104
18- 3:	PgMYB103	PgMYB131	1e-61
18- 4:	PgMYB104	PgMYB128	3e-67
18- 5:	PgMYB107	PgMYB124	1e-88
18- 6:	PgMYB108	PgMYB123	7e-93
18- 7:	PgMYB109	PgMYB117	2e-102
18- 8:	PgMYB114	PgMYB116	9e-15
## Alignment 19: score=284.0 e_value=4.3e-10 N=6 Pg3&Pg4 minus
19- 0:	PgMYB96	PgMYB158	4e-100
19- 1:	PgMYB99	PgMYB153	4e-42
19- 2:	PgMYB101	PgMYB151	4e-37
19- 3:	PgMYB108	PgMYB145	6e-50
19- 4:	PgMYB109	PgMYB143	5e-65
19- 5:	PgMYB114	PgMYB140	4e-14
## Alignment 20: score=262.0 e_value=5e-11 N=6 Pg3&Pg4 minus
20- 0:	PgMYB97	PgMYB161	7e-84
20- 1:	PgMYB115	PgMYB160	9e-64
20- 2:	PgMYB117	PgMYB158	2e-78
20- 3:	PgMYB127	PgMYB152	7e-14
20- 4:	PgMYB132	PgMYB151	1e-31
20- 5:	PgMYB133	PgMYB143	1e-86
## Alignment 21: score=317.0 e_value=4e-15 N=7 Pg3&Pg5 plus
21- 0:	PgMYB96	PgMYB168	8e-48
21- 1:	PgMYB101	PgMYB175	4e-34
21- 2:	PgMYB103	PgMYB176	3e-31
21- 3:	PgMYB112	PgMYB182	2e-32
21- 4:	PgMYB123	PgMYB187	6e-51
21- 5:	PgMYB124	PgMYB189	3e-62
21- 6:	PgMYB128	PgMYB197	2e-59
## Alignment 22: score=272.0 e_value=7.5e-11 N=6 Pg3&Pg5 minus
22- 0:	PgMYB110	PgMYB197	8e-11
22- 1:	PgMYB112	PgMYB196	4e-32
22- 2:	PgMYB123	PgMYB195	6e-71
22- 3:	PgMYB130	PgMYB183	1e-47
22- 4:	PgMYB131	PgMYB182	2e-29
22- 5:	PgMYB138	PgMYB178	7e-49
## Alignment 23: score=332.0 e_value=8.4e-12 N=7 Pg4&Pg6 minus
23- 0:	PgMYB146	PgMYB227	1e-74
23- 1:	PgMYB147	PgMYB224	4e-59
23- 2:	PgMYB154	PgMYB217	1e-71
23- 3:	PgMYB155	PgMYB212	3e-68
23- 4:	PgMYB156	PgMYB211	1e-39
23- 5:	PgMYB159	PgMYB208	5e-41
23- 6:	PgMYB164	PgMYB204	2e-60
## Alignment 24: score=338.0 e_value=1.2e-13 N=7 Pg5&Pg7 minus
24- 0:	PgMYB172	PgMYB256	5e-88
24- 1:	PgMYB178	PgMYB254	6e-55
24- 2:	PgMYB181	PgMYB248	2e-16
24- 3:	PgMYB184	PgMYB246	4e-75
24- 4:	PgMYB185	PgMYB245	8e-68
24- 5:	PgMYB186	PgMYB244	6e-44
24- 6:	PgMYB187	PgMYB243	2e-85
