# Supplementary material for: MYB Transcription Factor Family in Pearl Millet: Genome-Wide Identification, Evolutionary Progression and Expression Analysis Under Abiotic Stress and Phytohormone Treatments
Source: Preprints.org preprint supplement (doi:10.20944/preprints202208.0315.v1), 2022-08-17
Supplement: Supplementary file 2 [file Additional Table S1.xlsx]

## Sheet: Sheet1
Table S1: Sequence characteristics and chromosomal coordinates of identified 279 PgMYB members in pearl millet
PgMYB	Database Gene ID	Chromosome	Strand (+/-)	Chromosomal Coordinates		bp length	Exons	Introns	Sequence length (amino acids)	Molecular weight (kDa)	Theoretical pI	The instability index	Aliphatic index	Grand average of hydropathicity (GRAVY)	Sub-cellular localization
				Start	End
PgMYB1	Pgl_GLEAN_10012352	chr1	+	797639	798571	932	3	2	237	27053.9	8.68	72.58	64.64	-0.608	Nucleus
PgMYB2	Pgl_GLEAN_10025141	chr1	-	2587119	2590232	3113	5	4	284	31970.5	5.76	55.09	66.13	-0.744	Nucleus
PgMYB3	Pgl_GLEAN_10017114	chr1	+	9095623	9099238	3615	3	2	79	9222.61	7.81	48.12	80.38	-0.395	Chloroplast
PgMYB4	Pgl_GLEAN_10019982	chr1	-	52231622	52232874	1252	3	2	288	31491.6	6.37	45.8	63.02	-0.425	Nucleus
PgMYB5	Pgl_GLEAN_10034693	chr1	-	75861241	75869466	8225	4	3	319	35104	11.31	62.45	62.82	-0.771	Nucleus
PgMYB6	Pgl_GLEAN_10034704	chr1	-	76208983	76210510	1527	4	3	407	43302	6.55	67.07	68.5	-0.596	Chloroplast
PgMYB7	Pgl_GLEAN_10034708	chr1	+	76466325	76467272	947	2	1	277	undefined		56.96	50.58	-0.484	Nucleus
PgMYB8	Pgl_GLEAN_10034717	chr1	-	76658830	76660519	1689	3	2	353	39238.8	5.84	49.1	62.83	-0.748	Nucleus
PgMYB9	Pgl_GLEAN_10031720	chr1	-	79574293	79575500	1207	3	2	315	34667.2	5.94	63.97	65.71	-0.591	Nucleus
PgMYB10	Pgl_GLEAN_10031728	chr1	-	79736881	79740866	3985	5	4	252	26511.1	6.54	47.59	59.33	-0.598	Chloroplast
PgMYB11	Pgl_GLEAN_10020657	chr1	-	97682462	97683410	948	2	1	239	27458.3	7.05	33.17	64.85	-0.685	Nucleus
PgMYB12	Pgl_GLEAN_10004174	chr1	+	101310791	101311942	1151	2	1	311	34826.2	5.85	33.93	68.07	-0.557	Nucleus
PgMYB13	Pgl_GLEAN_10004173	chr1	+	101331425	101332628	1203	3	2	299	33417.1	5.14	35.56	66.29	-0.55	Nucleus
PgMYB14	Pgl_GLEAN_10018773	chr1	-	183947465	183947731	266	1	0	88	10127.7	9.14	50.16	73.3	-0.733	Nucleus
PgMYB15	Pgl_GLEAN_10013538	chr1	-	189022495	189023276	781	2	1	143	15859.8	9.84	59.75	62.17	-0.615	Nucleus
PgMYB16	Pgl_GLEAN_10013542	chr1	-	189156135	189156871	736	2	1	171	18459.9	9.8	45.54	62.34	-0.421	Chloroplast
PgMYB17	Pgl_GLEAN_10001056	chr1	+	192824095	192827253	3158	2	1	329	35497.5	5.7	52.62	64.22	-0.599	Nucleus
PgMYB18	Pgl_GLEAN_10027640	chr1	-	193265982	193266996	1014	2	1	299	32866.1	6.51	51.73	59.67	-0.567	Nucleus
PgMYB19	Pgl_GLEAN_10025716	chr1	-	197223702	197229892	6190	7	6	608	67563.3	7.09	48.65	70.9	-0.596	Nucleus
PgMYB20	Pgl_GLEAN_10005225	chr1	-	200181687	200190462	8775	4	3	608	67686	9.86	60.59	60.21	-1.094	Nucleus
PgMYB21	Pgl_GLEAN_10026647	chr1	+	202002759	202009044	6285	10	9	795	88168.2	5.07	41.63	66.94	-0.912	Nucleus
PgMYB22	Pgl_GLEAN_10035698	chr1	-	206068521	206070325	1804	6	5	393	43695.8	6.26	39.21	72.54	-0.711	Nucleus
PgMYB23	Pgl_GLEAN_10035730	chr1	-	206776998	206778877	1879	6	5	296	32736.9	6	58.06	71.86	-0.632	Chloroplast
PgMYB24	Pgl_GLEAN_10024602	chr1	+	224639875	224645394	5519	16	15	440	49502.1	9.53	54.67	73.82	-0.73	Nucleus
PgMYB25	Pgl_GLEAN_10013674	chr1	+	225721911	225723025	1114	3	2	272	29027	6.39	69.52	61.76	-0.548	Nucleus
PgMYB26	Pgl_GLEAN_10015908	chr1	+	227164183	227165346	1163	3	2	290	undefined		30.79	49.24	-0.285	Nucleus
PgMYB27	Pgl_GLEAN_10011787	chr1	+	232114066	232114337	271	1	0	87	9884.98	6.57	65.67	48.16	-0.93	Cytoplasm
PgMYB28	Pgl_GLEAN_10011796	chr1	+	232344407	232345210	803	2	1	232	25541.5	8.55	46.77	69.4	-0.595	Nucleus
PgMYB29	Pgl_GLEAN_10008875	chr1	-	234757730	234758186	456	2	1	103	11426.9	9.1	60.32	67.48	-0.599	Mitochondria
PgMYB30	Pgl_GLEAN_10008876	chr1	-	234764761	234765024	263	1	0	87	9622.68	8.98	61.97	57.47	-0.715	Mitochondria
PgMYB31	Pgl_GLEAN_10003768	chr1	-	236514008	236526450	12442	19	18	1817	198333	7.94	53.75	65.76	-0.71	Nucleus
PgMYB32	Pgl_GLEAN_10011958	chr1	-	237855754	237856470	716	2	1	197	21306.7	9.36	43.87	64.42	-0.662	Nucleus
PgMYB33	Pgl_GLEAN_10027871	chr1	+	241765297	241766737	1440	3	2	303	32391.4	9.81	70.35	60.56	-0.46	Nucleus
PgMYB34	Pgl_GLEAN_10029419	chr1	+	252841481	252843058	1577	3	2	430	47451.8	5.91	58.2	65.58	-0.649	Nucleus
PgMYB35	Pgl_GLEAN_10005876	chr1	+	254795399	254796970	1571	3	2	207	23071.8	5.2	62.36	82.08	-0.526	Nucleus
PgMYB36	Pgl_GLEAN_10021017	chr1	-	255574334	255584417	10083	3	2	402	undefined		36.41	50.92	-0.439	Chloroplast
PgMYB37	Pgl_GLEAN_10021026	chr1	+	255881990	255888985	6995	5	4	1590	172605	6.27	53.53	65.86	-0.606	Nucleus
PgMYB38	Pgl_GLEAN_10021620	chr1	-	258113995	258114905	910	2	1	249	27593.2	10.21	75.2	59.32	-0.782	Nucleus
PgMYB39	Pgl_GLEAN_10021618	chr1	-	258177854	258178903	1049	3	2	216	24420.4	9.39	70.42	58.01	-0.725	Nucleus
PgMYB40	Pgl_GLEAN_10011728	chr1	-	262951963	262952651	688	2	1	198	21260	6.2	55.75	77.98	-0.289	Nucleus
PgMYB41	Pgl_GLEAN_10011717	chr1	+	263118850	263131389	12539	10	9	941	104575	5.11	53.69	65.31	-0.709	Nucleus
PgMYB42	Pgl_GLEAN_10038213	chr1	-	270595969	270601579	5610	8	7	636	69319.9	6.66	48.74	76.12	-0.314	Nucleus
PgMYB43	Pgl_GLEAN_10038222	chr1	+	270683805	270684526	721	2	1	201	22014.7	9.45	61.1	73.93	-0.711	Nucleus
PgMYB44	Pgl_GLEAN_10038224	chr1	-	270729510	270730306	796	2	1	225	24851.8	8.94	61.05	62.13	-0.851	Nucleus
PgMYB45	Pgl_GLEAN_10009918	chr1	-	274900694	274901836	1142	2	1	339	36594.2	6.18	57.52	70.59	-0.436	Nucleus
PgMYB46	Pgl_GLEAN_10013171	chr2	+	3124453	3126666	2213	3	2	443	50199.7	5.77	56.35	68.89	-0.591	Nucleus
PgMYB47	Pgl_GLEAN_10022854	chr2	+	8374146	8375336	1190	3	2	317	34928.8	8.5	59.92	68.3	-0.515	Nucleus
PgMYB48	Pgl_GLEAN_10013746	chr2	-	8836805	8841561	4756	5	4	291	undefined		42.54	73.23	-0.113	Chloroplast
PgMYB49	Pgl_GLEAN_10013734	chr2	-	9059016	9060247	1231	4	3	280	30261.2	8.63	68.61	64.54	-0.695	Nucleus
PgMYB50	Pgl_GLEAN_10023444	chr2	+	11364070	11369344	5274	12	11	565	63442.8	7.56	51.24	70.42	-0.782	Nucleus
PgMYB51	Pgl_GLEAN_10002927	chr2	-	15881959	15883302	1343	3	2	239	27347.2	6.33	65.89	56.03	-0.998	Nucleus
PgMYB52	Pgl_GLEAN_10001156	chr2	-	16117700	16130307	12607	21	20	1693	undefined	47.6	78.57	78.57	-0.553	Nucleus
PgMYB53	Pgl_GLEAN_10005188	chr2	+	16440909	16441463	554	1	0	184	20399.4	9.6	44.37	82.83	-0.291	Mitochondria
PgMYB54	Pgl_GLEAN_10002075	chr2	+	17571820	17572158	338	1	0	112	12118.2	8	85.9	47.05	-1.099	Nucleus
PgMYB55	Pgl_GLEAN_10013105	chr2	+	28088750	28091314	2564	5	4	348	37978.3	6.35	33.21	93.22	-0.254	Nucleus
PgMYB56	Pgl_GLEAN_10009335	chr2	+	28546397	28548210	1813	4	3	344	38258.4	5.03	59.07	60.81	-0.76	Nucleus
PgMYB57	Pgl_GLEAN_10004788	chr2	-	30477837	30485409	7572	6	5	390	41733.7	9.57	63.23	59.69	-0.553	Nucleus
PgMYB58	Pgl_GLEAN_10031141	chr2	-	36591916	36594448	2532	4	3	322	34412.1	5.37	64.29	67.39	-0.688	Nucleus
PgMYB59	Pgl_GLEAN_10021657	chr2	+	43401652	43403095	1443	3	2	265	29254.6	9.47	71.78	72.23	-0.513	Nucleus
PgMYB60	Pgl_GLEAN_10004603	chr2	+	47464253	47464684	431	2	1	91	10700.4	9.95	41.7	74.07	-0.721	Nucleus
PgMYB61	Pgl_GLEAN_10032286	chr2	+	49560523	49562884	2361	4	3	289	32987.2	5.8	43.07	78.58	-0.503	Nucleus
PgMYB62	Pgl_GLEAN_10011452	chr2	-	53257854	53258328	474	3	2	98	11618.8	11	33.68	86.43	-0.81	Mitochondria
PgMYB63	Pgl_GLEAN_10010867	chr2	-	53297119	53300327	3208	5	4	234	26216.6	9.2	53.13	71.71	-0.782	Nucleus
PgMYB64	Pgl_GLEAN_10010869	chr2	-	53341387	53350060	8673	5	4	141	16565.3	10.74	58.36	62.2	-0.911	Nucleus
PgMYB65	Pgl_GLEAN_10012817	chr2	+	57150290	57152288	1998	7	6	220	25262.8	9.6	35.69	62.91	-0.854	Nucleus
PgMYB66	Pgl_GLEAN_10022589	chr2	+	60432555	60435639	3084	5	4	130	14947.5	9.02	52.96	100.62	-0.032	Chloroplast
PgMYB67	Pgl_GLEAN_10021368	chr2	-	68782565	68786613	4048	7	6	268	29756.4	4.93	38.24	72.8	-0.453	Nucleus
PgMYB68	Pgl_GLEAN_10004924	chr2	-	69259023	69260454	1431	3	2	401	undefined		38.43	70.17	-0.298	Nucleus
PgMYB69	Pgl_GLEAN_10029006	chr2	-	88036698	88038188	1490	2	1	312	34647.7	5.8	27.97	66.03	-0.573	Nucleus
PgMYB70	Pgl_GLEAN_10029495	chr2	+	90670801	90676646	5845	12	11	718	77544	6.46	48.54	83.36	-0.292	Nucleus
PgMYB71	Pgl_GLEAN_10003307	chr2	+	90972902	90976261	3359	6	5	681	74171.1	5.97	42.9	79.32	-0.309	Nucleus
PgMYB72	Pgl_GLEAN_10036530	chr2	-	95224390	95229610	5220	10	9	762	84445.7	4.89	39.62	63.22	-0.941	Nucleus
PgMYB73	Pgl_GLEAN_10023193	chr2	+	97683813	97684722	909	3	2	250	27122.3	8.81	46.99	64.84	-0.588	Nucleus
PgMYB74	Pgl_GLEAN_10023203	chr2	+	98076819	98078515	1696	2	1	316	35709.1	8.41	33.07	62.34	-0.644	Nucleus
PgMYB75	Pgl_GLEAN_10028194	chr2	+	105210328	105211447	1119	3	2	323	36220	6.07	51.91	79.16	-0.584	Nucleus
PgMYB76	Pgl_GLEAN_10005446	chr2	+	118893917	118895114	1197	2	1	312	35526.6	6.35	38.6	57.85	-0.856	Nucleus
PgMYB77	Pgl_GLEAN_10032646	chr2	+	120285067	120286075	1008	4	3	227	25351.7	5.31	57.29	68.77	-0.634	Nucleus
PgMYB78	Pgl_GLEAN_10036901	chr2	+	127912146	127920027	7881	9	8	681	77076.3	8.44	39.17	59	-1.202	Nucleus
PgMYB79	Pgl_GLEAN_10023164	chr2	-	184327994	184329956	1962	3	2	290	31983	6	57.45	70.28	-0.572	Nucleus
PgMYB80	Pgl_GLEAN_10023163	chr2	-	184393490	184399542	6052	6	5	497	55922.9	6.72	54.99	70.7	-0.792	Nucleus
PgMYB81	Pgl_GLEAN_10021570	chr2	-	187134830	187135093	263	1	0	87	9503.37	6.02	49.08	50.46	-0.975	Chloroplast
PgMYB82	Pgl_GLEAN_10037977	chr2	-	194567818	194569963	2145	6	5	519	57397.4	6.02	66.48	62.22	-0.848	Nucleus
PgMYB83	Pgl_GLEAN_10028237	chr2	+	198578058	198589511	11453	20	19	1095	121386	8.91	50.64	67.01	-0.746	Nucleus
PgMYB84	Pgl_GLEAN_10018303	chr2	+	209090086	209093438	3352	9	8	680	74592.6	8.88	51.75	73.03	-0.564	Nucleus
PgMYB85	Pgl_GLEAN_10017572	chr2	-	213768147	213771923	3776	6	5	497	54085	6.18	50.67	72.41	-0.417	Chloroplast
PgMYB86	Pgl_GLEAN_10016698	chr2	+	217974037	217978016	3979	6	5	635	69260.4	6.07	44.4	75.35	-0.556	Nucleus
PgMYB87	Pgl_GLEAN_10027845	chr2	+	222878707	222880650	1943	6	5	350	38257.8	8.48	42.16	61.4	-0.521	Nucleus
PgMYB88	Pgl_GLEAN_10020538	chr2	+	236248342	236250458	2116	7	6	471	51663.6	6.23	61.24	65.22	-0.7	Nucleus
PgMYB89	Pgl_GLEAN_10018078	chr2	+	242053371	242054563	1192	3	2	284	undefined		63.6	49.15	-0.699	Nucleus
PgMYB90	Pgl_GLEAN_10003655	chr2	+	242667599	242668033	434	1	0	144	16508.8	11.34	82.71	47.5	-1.217	Nucleus
PgMYB91	Pgl_GLEAN_10031135	chr3	-	1588548	1590568	2020	6	5	378	41792.2	6.14	50.96	73.23	-0.396	Chloroplast
PgMYB92	Pgl_GLEAN_10002059	chr3	+	2107544	2110981	3437	6	5	734	79669.8	6.35	45.25	83.28	-0.295	Nucleus
PgMYB93	Pgl_GLEAN_10002978	chr3	-	3383904	3387612	3708	4	3	317	35200.5	9.61	67.85	57.98	-0.996	Nucleus
PgMYB94	Pgl_GLEAN_10010695	chr3	+	8058303	8060597	2294	6	5	274	30119.2	8.39	32.95	79.49	-0.538	Cytoplasm
PgMYB95	Pgl_GLEAN_10031638	chr3	+	9268884	9272016	3132	5	4	214	24082.4	9.46	46.39	74.77	-0.712	Nucleus
PgMYB96	Pgl_GLEAN_10012406	chr3	+	13130719	13131887	1168	3	2	325	36161.9	5.84	51.77	76.58	-0.471	Nucleus
PgMYB97	Pgl_GLEAN_10012225	chr3	+	16546883	16547771	888	3	2	182	20455.5	7.07	44.33	80.38	-0.51	Nucleus
PgMYB98	Pgl_GLEAN_10035006	chr3	-	22591523	22591795	272	1	0	90	10151	6.27	65.08	47.78	-1.282	Nucleus
PgMYB99	Pgl_GLEAN_10017936	chr3	-	25104795	25108562	3767	6	5	183	19926.1	6.28	35.51	70.98	-0.499	Peroxisome
PgMYB100	Pgl_GLEAN_10008203	chr3	+	25676997	25678321	1324	3	2	354	37285.4	4.57	48.22	78.93	-0.328	Nucleus
PgMYB101	Pgl_GLEAN_10027659	chr3	+	27229177	27231397	2220	5	4	476	50261.6	6.91	51.52	61.22	-0.578	Nucleus
PgMYB102	Pgl_GLEAN_10027682	chr3	+	28080709	28084771	4062	7	6	242	26616.1	9.47	42.76	67.31	-0.557	Nucleus
PgMYB103	Pgl_GLEAN_10004778	chr3	-	30560807	30563448	2641	6	5	300	32645.3	10.14	62.94	65.73	-0.491	Nucleus
PgMYB104	Pgl_GLEAN_10012460	chr3	-	35243056	35245684	2628	4	3	489	53694.9	5.24	51.01	47.01	-1.065	Nucleus
PgMYB105	Pgl_GLEAN_10029306	chr3	-	39068797	39070303	1506	3	2	184	20435.3	6.33	39.82	74.84	-0.459	Nucleus
PgMYB106	Pgl_GLEAN_10029303	chr3	-	39139785	39142393	2608	4	3	180	20307.7	7.65	62.97	53.72	-0.831	Nucleus
PgMYB107	Pgl_GLEAN_10008396	chr3	+	41426566	41427520	954	2	1	247	27878	5.68	68.17	60.93	-0.847	Nucleus
PgMYB108	Pgl_GLEAN_10027268	chr3	+	47927271	47928520	1249	3	2	290	32855.4	5.33	57.04	67.28	-0.757	Nucleus
PgMYB109	Pgl_GLEAN_10024409	chr3	-	59460364	59462238	1874	4	3	241	26546.9	7.66	60.13	66.97	-0.555	Nucleus
PgMYB110	Pgl_GLEAN_10006611	chr3	+	75833232	75841506	8274	18	17	947	104165	8.65	40.35	80.23	-0.311	Chloroplast
PgMYB111	Pgl_GLEAN_10030848	chr3	-	82373096	82377017	3921	6	5	421	45889.6	5.27	63.51	70.19	-0.487	Cytoplasm
PgMYB112	Pgl_GLEAN_10033508	chr3	+	115449110	115449967	857	3	2	200	21983	5.02	53.76	64.75	-0.859	Nucleus
PgMYB113	Pgl_GLEAN_10016618	chr3	-	126788468	126798360	9892	3	2	572	64539.6	9.8	62.61	61.78	-1.081	Nucleus
PgMYB114	Pgl_GLEAN_10003205	chr3	+	148681995	148689668	7673	9	8	853	92969.3	4.98	56.09	64.5	-0.611	Nucleus
PgMYB115	Pgl_GLEAN_10009766	chr3	-	172878161	172880023	1862	4	3	268	28940.5	7.22	47.5	74.78	-0.47	Nucleus
PgMYB116	Pgl_GLEAN_10038634	chr3	+	193927717	193932983	5266	4	3	977	109677	5.28	54.41	69.1	-0.955	Nucleus
PgMYB117	Pgl_GLEAN_10010553	chr3	+	230874042	230876313	2271	4	3	290	31752.6	6.21	62.91	70.48	-0.559	Nucleus
PgMYB118	Pgl_GLEAN_10000886	chr3	+	238259114	238262902	3788	7	6	559	61763.6	5.91	43.5	70.41	-0.524	Nucleus
PgMYB119	Pgl_GLEAN_10012731	chr3	-	238496740	238498133	1393	2	1	282	30757.4	5.72	35.69	65.74	-0.645	Nucleus
PgMYB120	Pgl_GLEAN_10026783	chr3	+	240556634	240560184	3550	8	7	632	68907.3	8.51	45.49	77.47	-0.486	Nucleus
PgMYB121	Pgl_GLEAN_10017764	chr3	+	241921093	241923853	2760	5	4	318	34954.8	6.26	44.29	64.21	-0.729	Mitochondria
PgMYB122	Pgl_GLEAN_10026093	chr3	-	249789179	249792338	3159	8	7	236	26080.9	8.46	55.82	86.36	-0.603	Nucleus
PgMYB123	Pgl_GLEAN_10018370	chr3	-	253450474	253452242	1768	4	3	240	26873.3	8.79	53.58	66.25	-0.824	Nucleus
PgMYB124	Pgl_GLEAN_10035636	chr3	-	256272527	256273940	1413	4	3	229	25959.2	5.78	60.1	64.41	-0.686	Nucleus
PgMYB125	Pgl_GLEAN_10003061	chr3	-	260702446	260703687	1241	4	3	185	20486.3	7	36.93	78.76	-0.362	Nucleus
PgMYB126	Pgl_GLEAN_10003063	chr3	-	260772760	260774965	2205	4	3	207	22549.4	8.15	44.92	67.87	-0.544	Nucleus
PgMYB127	Pgl_GLEAN_10003248	chr3	+	265972808	265974631	1823	1	0	607	68112.2	8.74	52.94	59.77	-1.013	Nucleus
PgMYB128	Pgl_GLEAN_10006479	chr3	+	268368849	268372052	3203	4	3	722	undefined		58.61	41.07	-0.807	Cytoplasm
PgMYB129	Pgl_GLEAN_10033575	chr3	+	272420804	272422298	1494	3	2	338	36307.1	8.85	65.75	62.49	-0.429	Nucleus
PgMYB130	Pgl_GLEAN_10015401	chr3	+	277698007	277698927	920	3	2	114	12888.7	8.66	62.5	75.35	-0.646	Nucleus
PgMYB131	Pgl_GLEAN_10018049	chr3	+	278678155	278681210	3055	6	5	303	32371.5	9.45	59.45	63.96	-0.48	Nucleus
PgMYB132	Pgl_GLEAN_10022511	chr3	-	282395600	282397845	2245	6	5	452	49572.7	8.3	54.2	64.8	-0.662	Nucleus
PgMYB133	Pgl_GLEAN_10023805	chr3	-	285681859	285682510	651	2	1	156	17813.3	9.71	58.99	67.56	-0.927	Nucleus
PgMYB134	Pgl_GLEAN_10023817	chr3	-	285885710	285887095	1385	4	3	356	37838.6	5.04	50.76	60.98	-0.482	Nucleus
PgMYB135	Pgl_GLEAN_10004210	chr3	+	286573502	286575753	2251	6	5	265	29679.9	9.27	38.55	76.6	-0.75	Mitochondria
PgMYB136	Pgl_GLEAN_10020401	chr3	-	287922857	287925393	2536	2	1	224	26761.9	8.72	63.84	53.17	-1.405	Nucleus
PgMYB137	Pgl_GLEAN_10031939	chr3	-	299507833	299508581	748	2	1	226	24666	8.76	58.65	71.77	-0.42	Nucleus
PgMYB138	Pgl_GLEAN_10031924	chr3	-	299679876	299682059	2183	7	6	441	48028.2	6.36	55.43	72.63	-0.498	Nucleus
PgMYB139	Pgl_GLEAN_10031849	chr3	-	300773715	300776344	2629	2	1	295	30468.8	6.26	58.21	60.58	-0.592	Nucleus
PgMYB140	Pgl_GLEAN_10005856	chr4	-	870277	875390	5113	4	3	798	90697.8	7.6	53.62	73.7	-0.859	Nucleus
PgMYB141	Pgl_GLEAN_10015096	chr4	-	7098710	7103531	4821	6	5	279	29769.2	6.3	51.4	65.48	-0.435	Chloroplast
PgMYB142	Pgl_GLEAN_10012904	chr4	-	7927410	7929209	1799	6	5	228	24145.7	8.47	61.23	60.48	-0.607	Nucleus
PgMYB143	Pgl_GLEAN_10015286	chr4	-	9046418	9047404	986	2	1	177	19531	9.67	62.79	65.2	-0.763	Nucleus
PgMYB144	Pgl_GLEAN_10021819	chr4	+	12207282	12208385	1103	1	0	367			33.78	34.85	-0.591	Nucleus
PgMYB145	Pgl_GLEAN_10007729	chr4	-	13976894	13977825	931	3	2	240	27360	8.19	74.22	60.54	-0.713	Nucleus
PgMYB146	Pgl_GLEAN_10026254	chr4	+	14946705	14957428	10723	6	5	380	43171.5	9.19	54.24	73.71	-0.674	Nucleus
PgMYB147	Pgl_GLEAN_10025439	chr4	+	21915818	21918475	2657	2	1	445			55.81	54.94	-0.501	Nucleus
PgMYB148	Pgl_GLEAN_10030874	chr4	+	55518487	55523094	4607	5	4	341			63.44	58.45	-0.552	Nucleus
PgMYB149	Pgl_GLEAN_10030875	chr4	-	55528138	55530117	1979	3	2	340	37060.6	5.5	64.13	66.71	-0.493	Nucleus
PgMYB150	Pgl_GLEAN_10027372	chr4	-	60096525	60098621	2096	3	2	288	30779	6.16	69.42	75.45	-0.325	Nucleus
PgMYB151	Pgl_GLEAN_10023931	chr4	-	62891728	62901059	9331	8	7	747	81951.9	5.98	49.2	54.19	-0.823	Nucleus
PgMYB152	Pgl_GLEAN_10031411	chr4	+	66338242	66339346	1104	2	1	274	28922.5	7.75	58.37	72.23	-0.343	plas
PgMYB153	Pgl_GLEAN_10031417	chr4	+	66752123	66755059	2936	6	5	167	18175	5.55	45.19	63.71	-0.669	Nucleus
PgMYB154	Pgl_GLEAN_10031352	chr4	-	73303376	73304606	1230	3	2	328	35105	5.66	48.18	67.07	-0.488	Nucleus
PgMYB155	Pgl_GLEAN_10035466	chr4	+	104614175	104616247	2072	3	2	318	35527.9	8.18	55.42	64.43	-0.715	Nucleus
PgMYB156	Pgl_GLEAN_10011393	chr4	+	109073033	109074647	1614	3	2	323	35478.1	8.33	68.97	62.57	-0.594	Nucleus
PgMYB157	Pgl_GLEAN_10030833	chr4	+	116647270	116648339	1069	2	1	156	17915.3	5.55	26.84	63.85	-0.908	Nucleus
PgMYB158	Pgl_GLEAN_10010676	chr4	+	117024393	117025586	1193	2	1	334			42.01	53.53	-0.339	Nucleus
PgMYB159	Pgl_GLEAN_10037578	chr4	+	121139005	121140827	1822	2	1	269	29416.8	9.84	58.89	56.65	-0.643	Nucleus
PgMYB160	Pgl_GLEAN_10034301	chr4	+	140810373	140811158	785	1	0	261	28698.8	8.43	46.07	78.89	-0.522	Nucleus
PgMYB161	Pgl_GLEAN_10034291	chr4	+	141183101	141185105	2004	2	1	262	29041.5	6.66	49.46	70.08	-0.73	Nucleus
PgMYB162	Pgl_GLEAN_10015816	chr4	-	150236387	150237263	876	3	2	208	23932.9	7.65	57.73	61.92	-0.857	Nucleus
PgMYB163	Pgl_GLEAN_10018451	chr4	+	172584414	172590247	5833	9	8	746	81334.7	6.3	50.57	76.51	-0.382	Nucleus
PgMYB164	Pgl_GLEAN_10033016	chr4	-	175094529	175096819	2290	3	2	143	16369.9	9.36	50.38	67.69	-0.569	Nucleus
PgMYB165	Pgl_GLEAN_10034098	chr4	-	182479824	182481583	1759	2	1	266	28464.7	9.43	72.36	56.54	-0.574	Chloroplast
PgMYB166	Pgl_GLEAN_10033229	chr4	+	190612344	190617552	5208	8	7	628	69150.2	4.82	40.13	68.5	-0.791	Nucleus
PgMYB167	Pgl_GLEAN_10029589	chr5	+	17783534	17790254	6720	5	4	1079	117215	5.34	51.54	73	-0.536	Nucleus
PgMYB168	Pgl_GLEAN_10009748	chr5	-	33613428	33616783	3355	2	1	432	48131.2	4.66	58.81	66.6	-0.763	Nucleus
PgMYB169	Pgl_GLEAN_10007923	chr5	+	34052815	34054453	1638	4	3	432	46248.2	6.41	73.86	58.87	-0.75	Nucleus
PgMYB170	Pgl_GLEAN_10011359	chr5	-	45438179	45444880	6701	8	7	826	90327.2	4.82	45.52	74.32	-0.432	Nucleus
PgMYB171	Pgl_GLEAN_10012527	chr5	+	47076944	47082709	5765	6	5	700	76316.7	5.45	41.69	68.83	-0.553	Nucleus
PgMYB172	Pgl_GLEAN_10021337	chr5	+	54588658	54589967	1309	2	1	293	33063.1	9.12	31.24	70.82	-0.486	Cytoplasm
PgMYB173	Pgl_GLEAN_10005226	chr5	+	63826603	63832877	6274	5	4	574	63153	5.46	41.6	76.92	-0.472	Nucleus
PgMYB174	Pgl_GLEAN_10007629	chr5	+	69761871	69764398	2527	6	5	336	36455.2	7.85	40.53	64.73	-0.544	Nucleus
PgMYB175	Pgl_GLEAN_10018726	chr5	-	71218505	71224517	6012	8	7	282	31139	7.06	56.09	66.81	-0.602	Nucleus
PgMYB176	Pgl_GLEAN_10018730	chr5	+	71261073	71263189	2116	5	4	237	26473.6	7.09	74.09	66.24	-0.658	Nucleus
PgMYB177	Pgl_GLEAN_10026117	chr5	-	74695424	74697000	1576	3	2	422	45106.3	6.72	61.96	64.12	-0.586	Nucleus
PgMYB178	Pgl_GLEAN_10038507	chr5	+	80929335	80931746	2411	7	6	473	51923.6	5.56	69.14	68.05	-0.727	Nucleus
PgMYB179	Pgl_GLEAN_10016206	chr5	-	82160177	82163218	3041	4	3	725	79046.6	4.37	49.59	80.72	-0.554	Cytoplasm
PgMYB180	Pgl_GLEAN_10021771	chr5	-	99603046	99604465	1419	5	4	272	29681.5	9.32	55.37	71.07	-0.572	Nucleus
PgMYB181	Pgl_GLEAN_10001215	chr5	+	100219849	100222160	2311	3	2	315	34053	6.51	63.33	64.7	-0.578	Chloroplast
PgMYB182	Pgl_GLEAN_10003870	chr5	+	106827781	106829655	1874	6	5	250	28268.8	9.52	49.92	62.72	-0.723	Nucleus
PgMYB183	Pgl_GLEAN_10034383	chr5	+	115971950	115973798	1848	3	2	258	28464.4	6.05	50.41	80.47	-0.48	Nucleus
PgMYB184	Pgl_GLEAN_10024859	chr5	-	120455141	120456053	912	2	1	214	23575.8	8.91	51.92	74.86	-0.633	Nucleus
PgMYB185	Pgl_GLEAN_10024824	chr5	+	121391288	121392666	1378	4	3	175	19369.7	6.43	63.83	73.14	-0.527	Nucleus
PgMYB186	Pgl_GLEAN_10015206	chr5	-	124674930	124676977	2047	6	5	351	39025.1	6.6	53.93	75.61	-0.638	Chloroplast
PgMYB187	Pgl_GLEAN_10026185	chr5	+	126859479	126860936	1457	2	1	324	35914.9	5.36	61.73	70.59	-0.572	Nucleus
PgMYB188	Pgl_GLEAN_10009674	chr5	+	128477805	128481179	3374	7	6	431	47290.8	5.45	58.04	67.05	-0.668	Nucleus
PgMYB189	Pgl_GLEAN_10030123	chr5	+	130233276	130241950	8674	3	2	359			52.96	62.42	-0.646	Nucleus
PgMYB190	Pgl_GLEAN_10014494	chr5	+	137252839	137253461	622	2	1	73	7467.46	6.54	33.3	60.41	-0.244	Nucleus
PgMYB191	Pgl_GLEAN_10023408	chr5	-	138360524	138367951	7427	16	15	825	91120.7	7.03	42.69	76.88	-0.522	Cytoplasm
PgMYB192	Pgl_GLEAN_10024234	chr5	-	139121390	139122136	746	1	0	248	26705.5	8.39	53.51	81.09	-0.248	Nucleus
PgMYB193	Pgl_GLEAN_10014410	chr5	-	141218324	141222976	4652	5	4	689	74006.1	6.32	50.7	75.59	-0.461	Nucleus
PgMYB194	Pgl_GLEAN_10013357	chr5	-	143247264	143248987	1723	3	2	487	54560.4	4.48	54.01	53.84	-0.778	Nucleus
PgMYB195	Pgl_GLEAN_10009509	chr5	+	153816437	153817649	1212	3	2	244	28078.4	6.55	73.28	73.61	-0.862	Nucleus
PgMYB196	Pgl_GLEAN_10037679	chr5	-	154904694	154907779	3085	5	4	387	42243.3	10.05	72.47	62.25	-0.615	Chloroplast
PgMYB197	Pgl_GLEAN_10037829	chr5	-	156905882	156909230	3348	4	3	420	44880.2	6.1	50.41	46.64	-0.905	Nucleus
PgMYB198	Pgl_GLEAN_10001423	chr6	-	1875505	1878800	3295	9	8	638	69500.9	9.41	38.63	72.93	-0.518	Chloroplast
PgMYB199	Pgl_GLEAN_10001419	chr6	+	1913459	1914262	803	1	0	267			22.9	46.78	-0.51	Nucleus
PgMYB200	Pgl_GLEAN_10022172	chr6	-	4151620	4152568	948	2	1	267	28696.7	8.83	47.28	55.36	-0.597	Nucleus
PgMYB201	Pgl_GLEAN_10022161	chr6	-	4306302	4306577	275	1	0	91	10197.6	9.13	82.57	56.92	-0.634	Chloroplast
PgMYB202	Pgl_GLEAN_10022160	chr6	-	4322908	4323210	302	1	0	100	11594.7	8.21	93.06	50.7	-0.993	Nucleus
PgMYB203	Pgl_GLEAN_10010463	chr6	+	21165723	21169107	3384	5	4	576	64585.4	5.07	48.92	83.06	-0.402	Nucleus
PgMYB204	Pgl_GLEAN_10031693	chr6	-	26091126	26092739	1613	2	1	118	13488.8	9.53	31.84	78.64	-0.571	Nucleus
PgMYB205	Pgl_GLEAN_10020208	chr6	-	29277887	29278736	849	2	1	108	12496	10.61	40.1	64.17	-0.866	Cytoplasm
PgMYB206	Pgl_GLEAN_10020166	chr6	-	30054880	30060540	5660	3	2	470	51118.6	4.78	65.29	66.06	-0.533	Nucleus
PgMYB207	Pgl_GLEAN_10032441	chr6	+	31625223	31626077	854	2	1	247	27523.8	8.63	63.84	56.6	-0.73	Nucleus
PgMYB208	Pgl_GLEAN_10032472	chr6	+	32515311	32516764	1453	2	1	405	43430.3	5.54	59.6	62.25	-0.568	Nucleus
PgMYB209	Pgl_GLEAN_10007906	chr6	+	32873783	32884096	10313	10	9	1205	131036	5.89	52.56	74.17	-0.485	Nucleus
PgMYB210	Pgl_GLEAN_10005529	chr6	-	34150962	34156255	5293	6	5	561	60556.2	8.5	43.36	75.29	-0.481	Nucleus
PgMYB211	Pgl_GLEAN_10037254	chr6	-	44081902	44084574	2672	3	2	551	59318	5.15	54.69	66.81	-0.454	Nucleus
PgMYB212	Pgl_GLEAN_10037339	chr6	-	64792353	64793590	1237	4	3	247	27159.2	5.77	59.24	65.95	-0.646	Nucleus
PgMYB213	Pgl_GLEAN_10024574	chr6	-	69960865	69962449	1584	4	3	321	34090.5	7.15	44	75.83	-0.216	Nucleus
PgMYB214	Pgl_GLEAN_10012285	chr6	-	70936081	70941636	5555	6	5	289	31606.9	9.47	59.49	69.76	-0.75	Nucleus
PgMYB215	Pgl_GLEAN_10020860	chr6	+	74057608	74058689	1081	2	1	315	34339	5.95	60.99	65.49	-0.566	Nucleus
PgMYB216	Pgl_GLEAN_10036366	chr6	-	76271038	76271964	926	3	2	218	23569.3	6.43	42.93	64.54	-0.644	Nucleus
PgMYB217	Pgl_GLEAN_10032520	chr6	+	79346725	79347872	1147	2	1	251	27661.3	9.07	54.88	69.32	-0.59	Nucleus
PgMYB218	Pgl_GLEAN_10023913	chr6	+	87236926	87237192	266	1	0	88	10076.2	8.01	74.62	51.02	-1.007	Cytoplasm
PgMYB219	Pgl_GLEAN_10022186	chr6	+	88007335	88007812	477	2	1	130	14503.5	10.22	42.11	81.15	-0.653	Nucleus
PgMYB220	Pgl_GLEAN_10009281	chr6	-	108023846	108025756	1910	3	2	181	20350.7	5.63	46.41	59.34	-0.865	Cytoplasm
PgMYB221	Pgl_GLEAN_10012114	chr6	+	109683206	109683574	368	1	0	122	14137.2	9.65	74.15	78.52	-0.799	Mitochondria
PgMYB222	Pgl_GLEAN_10009833	chr6	-	117624123	117627064	2941	5	4	328	35289.4	8.54	34.04	89.94	-0.283	Nucleus
PgMYB223	Pgl_GLEAN_10014164	chr6	+	123101735	123115510	13775	22	21	1948	212187	8.18	58.72	63.91	-0.762	Nucleus
PgMYB224	Pgl_GLEAN_10035445	chr6	+	167642039	167643369	1330	3	2	328	35827.7	5.87	55.97	60.79	-0.603	Nucleus
PgMYB225	Pgl_GLEAN_10005688	chr6	-	182043647	182045109	1462	6	5	306	33892.1	8.7	36.63	71.5	-0.645	Nucleus
PgMYB226	Pgl_GLEAN_10022280	chr6	-	184262794	184266876	4082	3	2	335			42.46	75.13	-0.622	Nucleus
PgMYB227	Pgl_GLEAN_10030436	chr6	-	186179952	186180881	929	1	0	309	33404.1	5.39	61.22	68.12	-0.396	Nucleus
PgMYB228	Pgl_GLEAN_10020214	chr6	+	189864101	189865006	905	3	2	153	16719.9	9.77	50.99	61.96	-0.672	Cytoplasm
PgMYB229	Pgl_GLEAN_10010138	chr6	+	190788488	190789969	1481	3	2	423	46969.5	6.51	62.38	69.86	-0.662	Nucleus
PgMYB230	Pgl_GLEAN_10014000	chr6	-	199563038	199569338	6300	3	2	281	29910.3	9.03	71.93	56.19	-0.473	Nucleus
PgMYB231	Pgl_GLEAN_10014001	chr6	+	199646499	199647552	1053	2	1	311	34106	8.66	62.88	63.5	-0.605	Nucleus
PgMYB232	Pgl_GLEAN_10014003	chr6	+	199744297	199745814	1517	4	3	258	28261.5	8.69	59.66	60.04	-0.63	Nucleus
PgMYB233	Pgl_GLEAN_10030557	chr6	-	216479281	216480633	1352	4	3	259	28625.6	6.94	44.23	76.22	-0.415	Nucleus
PgMYB234	Pgl_GLEAN_10007566	chr6	-	219298567	219300114	1547	3	2	309	34141.3	8.68	51.09	61.26	-0.669	Nucleus
PgMYB235	Pgl_GLEAN_10004547	chr6	-	225667939	225669521	1582	8	7	281	30593.7	9.21	50.99	77.47	-0.407	Nucleus
PgMYB236	Pgl_GLEAN_10016246	chr6	+	226495017	226497467	2450	6	5	303	32987.3	8.49	40.79	80.4	-0.489	Nucleus
PgMYB237	Pgl_GLEAN_10028933	chr6	-	227310821	227311711	890	2	1	223	24338.3	7.63	83.91	61.03	-0.562	Nucleus
PgMYB238	Pgl_GLEAN_10028934	chr6	+	227321640	227322716	1076	3	2	274	29197.5	8.12	60.98	63.61	-0.454	Nucleus
PgMYB239	Pgl_GLEAN_10024668	chr6	-	231798060	231799103	1043	2	1	261	28824.7	5.78	71.57	73.6	-0.45	Nucleus
PgMYB240	Pgl_GLEAN_10024648	chr6	-	232180107	232181053	946	3	2	236			34.5	54.24	-0.422	Nucleus
PgMYB241	Pgl_GLEAN_10024645	chr6	-	232325639	232327559	1920	3	2	274	29106.9	9.95	58.56	63.76	-0.464	Chloroplast
PgMYB242	Pgl_GLEAN_10036207	chr6	+	233953452	233954524	1072	3	2	225	25417.9	7.78	50.26	79.29	-0.509	Nucleus
PgMYB243	Pgl_GLEAN_10001965	chr7	+	135966	136955	989	3	2	228	25448.5	5.84	56.01	73.33	-0.608	Nucleus
PgMYB244	Pgl_GLEAN_10000710	chr7	-	730454	732722	2268	3	2	288	30679	6.22	56.46	69.51	-0.656	Nucleus
PgMYB245	Pgl_GLEAN_10015650	chr7	-	6539265	6540649	1384	3	2	335	35854.7	5.57	61.93	66.24	-0.567	Nucleus
PgMYB246	Pgl_GLEAN_10013323	chr7	+	7259862	7261069	1207	3	2	333			50.13	39.58	-0.544	Nucleus
PgMYB247	Pgl_GLEAN_10013308	chr7	+	7560160	7564132	3972	14	13	675	74406.5	4.92	53.91	63.78	-0.728	Nucleus
PgMYB248	Pgl_GLEAN_10016493	chr7	+	19593821	19594830	1009	2	1	273	29791.4	5.33	68.9	64.87	-0.616	Nucleus
PgMYB249	Pgl_GLEAN_10015781	chr7	+	21036167	21038191	2024	4	3	294	31881.7	6.79	47.7	67.55	-0.534	Nucleus
PgMYB250	Pgl_GLEAN_10013918	chr7	-	32335924	32346946	11022	10	9	2299	255884	6.8	51.07	73.77	-0.703	Nucleus
PgMYB251	Pgl_GLEAN_10013916	chr7	-	32400720	32402099	1379	3	2	381	40316.6	6.34	49.8	65.67	-0.317	Nucleus
PgMYB252	Pgl_GLEAN_10001403	chr7	-	38914397	38915278	881	2	1	257	28498.9	8.99	45.2	81.4	-0.443	Nucleus
PgMYB253	Pgl_GLEAN_10019811	chr7	+	44995914	44999997	4083	2	1	283	30568.2	5.82	51.21	75.44	-0.475	Nucleus
PgMYB254	Pgl_GLEAN_10010237	chr7	-	57979646	57982697	3051	6	5	313	34054.4	5.76	49.49	61.79	-0.863	Nucleus
PgMYB255	Pgl_GLEAN_10029681	chr7	-	68717409	68718324	915	3	2	214	24878.6	6.59	26.49	60.09	-0.918	Nucleus
PgMYB256	Pgl_GLEAN_10029677	chr7	+	69252204	69253297	1093	2	1	292	32694.6	9.34	37.85	60.14	-0.699	Nucleus
PgMYB257	Pgl_GLEAN_10004522	chr7	-	96511602	96513275	1673	4	3	94	10998.8	6.55	46.81	93.51	-0.094	Chloroplast
PgMYB258	Pgl_GLEAN_10027595	chr7	-	99140532	99145321	4789	6	5	970	104876	5.79	53.51	67.93	-0.744	Nucleus
PgMYB259	Pgl_GLEAN_10019884	chr7	+	111509902	111516281	6379	14	13	1080	120262	9.31	54.25	75.6	-0.654	Nucleus
PgMYB260	Pgl_GLEAN_10021694	chr7	+	118162049	118166438	4389	8	7	421	45810.1	5.04	53.99	73.63	-0.574	Chloroplast
PgMYB261	Pgl_GLEAN_10016742	chr7	+	120784959	120785738	779	9	8	259	28617.3	5.89	52.74	74.94	-0.486	Nucleus
PgMYB262	Pgl_GLEAN_10016741	chr7	+	120932077	120933029	952	2	1	281	31197.1	5.25	55.55	69.47	-0.596	Nucleus
PgMYB263	Pgl_GLEAN_10016737	chr7	+	121099068	121099910	842	1	0	280	30896.9	5.17	48.49	76.32	-0.47	Nucleus
PgMYB264	Pgl_GLEAN_10002298	scaffold6150	+	56586	63797	7211	24	23	1125	129670	5.16	46.58	74.35	-0.791	Nucleus
PgMYB265	Pgl_GLEAN_10009993	scaffold292	-	169487	172212	2725	4	3	448			59.22	59.71	-0.836	Nucleus
PgMYB266	Pgl_GLEAN_10001752	scaffold10044	-	33003	37169	4166	5	4	447	48136.4	5.39	63.47	73.02	-0.417	Chloroplast
PgMYB267	Pgl_GLEAN_10019849	scaffold1053	-	645055	646259	1204	4	3	202	21987.8	6.3	41.04	61.44	-0.545	Nucleus
PgMYB268	Pgl_GLEAN_10011477	scaffold1203	+	72131	73258	1127	2	1	334	36103.6	6.49	60.71	72.25	-0.473	Nucleus
PgMYB269	Pgl_GLEAN_10002934	scaffold15545	+	8115	11316	3201	5	4	326	36179.8	6.88	38.9	76.47	-0.606	Nucleus
PgMYB270	Pgl_GLEAN_10005772	scaffold1560	+	97030	98246	1216	3	2	332	35688.8	7.28	57.62	65.93	-0.472	Nucleus
PgMYB271	Pgl_GLEAN_10025295	scaffold183	-	713746	715286	1540	3	2	313	32603.2	8.8	54.31	60.54	-0.499	Nucleus
PgMYB272	Pgl_GLEAN_10008161	scaffold185	+	333099	337727	4628	6	5	198	20735.5	5.61	50.34	49.85	-0.704	Nucleus
PgMYB273	Pgl_GLEAN_10007103	scaffold1854	-	172543	173588	1045	2	1	256	26174.6	9.95	62.11	69.57	-0.29	Nucleus
PgMYB274	Pgl_GLEAN_10000440	scaffold2782	-	48376	49799	1423	3	2	375	40806.5	6.41	66.63	59.44	-0.507	Nucleus
PgMYB275	Pgl_GLEAN_10010343	scaffold3628	-	445725	447268	1543	5	4	358	38389.2	6.2	67.93	77.77	-0.439	Nucleus
PgMYB276	Pgl_GLEAN_10010344	scaffold3628	-	456648	458022	1374	4	3	276	29893.1	9.57	65.52	72.64	-0.604	Nucleus
PgMYB277	Pgl_GLEAN_10003373	scaffold3724	+	186843	187613	770	1	0	256	27809.3	10.79	63.69	62.46	-0.685	Nucleus
PgMYB278	Pgl_GLEAN_10004898	scaffold3831	-	234813	236237	1424	5	4	312	34613.1	8.52	61.01	66.6	-0.872	Nucleus
PgMYB279	Pgl_GLEAN_10003909	scaffold6003	-	204768	205769	1001	1	0	333			73.13	58.14	-0.48	Nucleus

## Sheet: Sheet2
2
4
2
2
3
3
1
2
2
4
1
1
2
0
1
1
1
1
6
3
9
5
5
15
2
2
0
1
1
0
18
1
2
2
2
2
4
1
2
1
9
7
1
1
1
2
2
4
3
11
2
20
0
0
4
3
5
3
2
1
3
2
4
4
6
4
6
2
1
11
5
9
2
1
2
1
3
8
2
5
0
5
19
8
5
5
5
6
2
0
5
5
3
5
4
2
2
0
5
2
4
6
5
3
2
3
1
2
3
17
5
2
2
8
3
3
3
6
1
7
4
7
3
3
3
3
0
3
2
2
5
5
1
3
5
1
1
6
1
3
5
5
1
0
2
5
1
4
2
2
7
1
5
2
2
2
1
1
1
0
1
2
8
2
1
7
4
1
3
7
5
1
4
5
7
4
2
6
3
4
2
5
2
1
3
5
1
6
2
1
15
0
4
2
2
4
3
8
0
1
0
0
4
1
1
2
1
1
9
5
2
3
3
5
1
2
1
0
1
2
0
4
21
2
5
2
0
2
2
2
1
3
3
2
7
5
1
2
1
2
2
2
2
2
2
2
13
1
3
9
2
1
1
5
2
1
3
5
13
7
8
1
0
23
3
4
3
1
4
2
2
5
1
2
4
3
0
4
0
