# Supplementary material for: MYB Transcription Factor Family in Pearl Millet: Genome-Wide Identification, Evolutionary Progression and Expression Analysis Under Abiotic Stress and Phytohormone Treatments
Source: Preprints.org preprint supplement (doi:10.20944/preprints202208.0315.v1), 2022-08-17
Supplement: Supplementary file 3 [file Additional Table S2.xlsx]

## Sheet: Sheet1
Table S2: List of primers used in qRT-PCR analysis for selected PgMYBs
PgMYB2	GCAGCTGTTCCAGTTCCATGAC	TCACTGCATCCTCCAGATGTC
PgMYB9	CCATTACCAGCGTTGACATACGG	CTGGAATACGAACTCCTGAAAGCC
PgMYB44	TCGACCTCAACCTATCCATAAGC	GCTCTTCCTTGTGGGTGTAGTTTC
PgMYB49	GTGGCTCACCAGTCGATTATG	TCATTTCCGGCTATACCCTTC
PgMYB61	GCCATGCCCATGAGTCAAGCATT	CGTTCTCCCAGCATACAGTCTGAG
PgMYB88	AGAGGTGCAAAGGAAACTACAGCTG	CATCCCAGTTTCCTCTTTCTCTGTG
PgMYB132	CTCAACTACGGGAATGGAAGCATATC	CAGGCACACTATTGGAGGTTGTCAT
PgMYB134	GACTACCAGTACCCGATGATGATG	CTTGCAACAACAGCAGAGTAACC
PgMYB151	GACACTAACCACCGCAGATTTAGAAGC	CCTGGGCAACCTCCTTTGATTCTTCT
PgMYB176	TTCCGTGGTTGCAGTCATTCATC	CCCTCAGGCTTCTGCTTGTTG
PgMYB187	CGGTCACCAACAGCAAACGCAG	GCCTGCGTGTACCACAAGTTG
PgMYB198	GACCCATTTCCTGGAACTAAAGGCAG	CCAACAGAGAAGGGCATCCTTATACAC
PgMYB229	GAAGCAATAGCTTGGGATTTGAGC	GATTGCATAGTTGCTGGTGTATCTCTG
PgMYB240	GGGTCGTTCCTCCTGGACTTCTG	GGTCGAGAGGGTAGTAGTAGCCG
PgMYB263	TCTTCCTCTTCTTCCTCCTCGTCG	CATGTCTCCTGGTGCTCAAACAGA
