# Supplementary figures and images for: MYB Transcription Factor Family in Pearl Millet: Genome-Wide Identification, Evolutionary Progression and Expression Analysis Under Abiotic Stress and Phytohormone Treatments
Source: Preprints.org preprint supplement (doi:10.20944/preprints202208.0315.v1), 2022-08-17

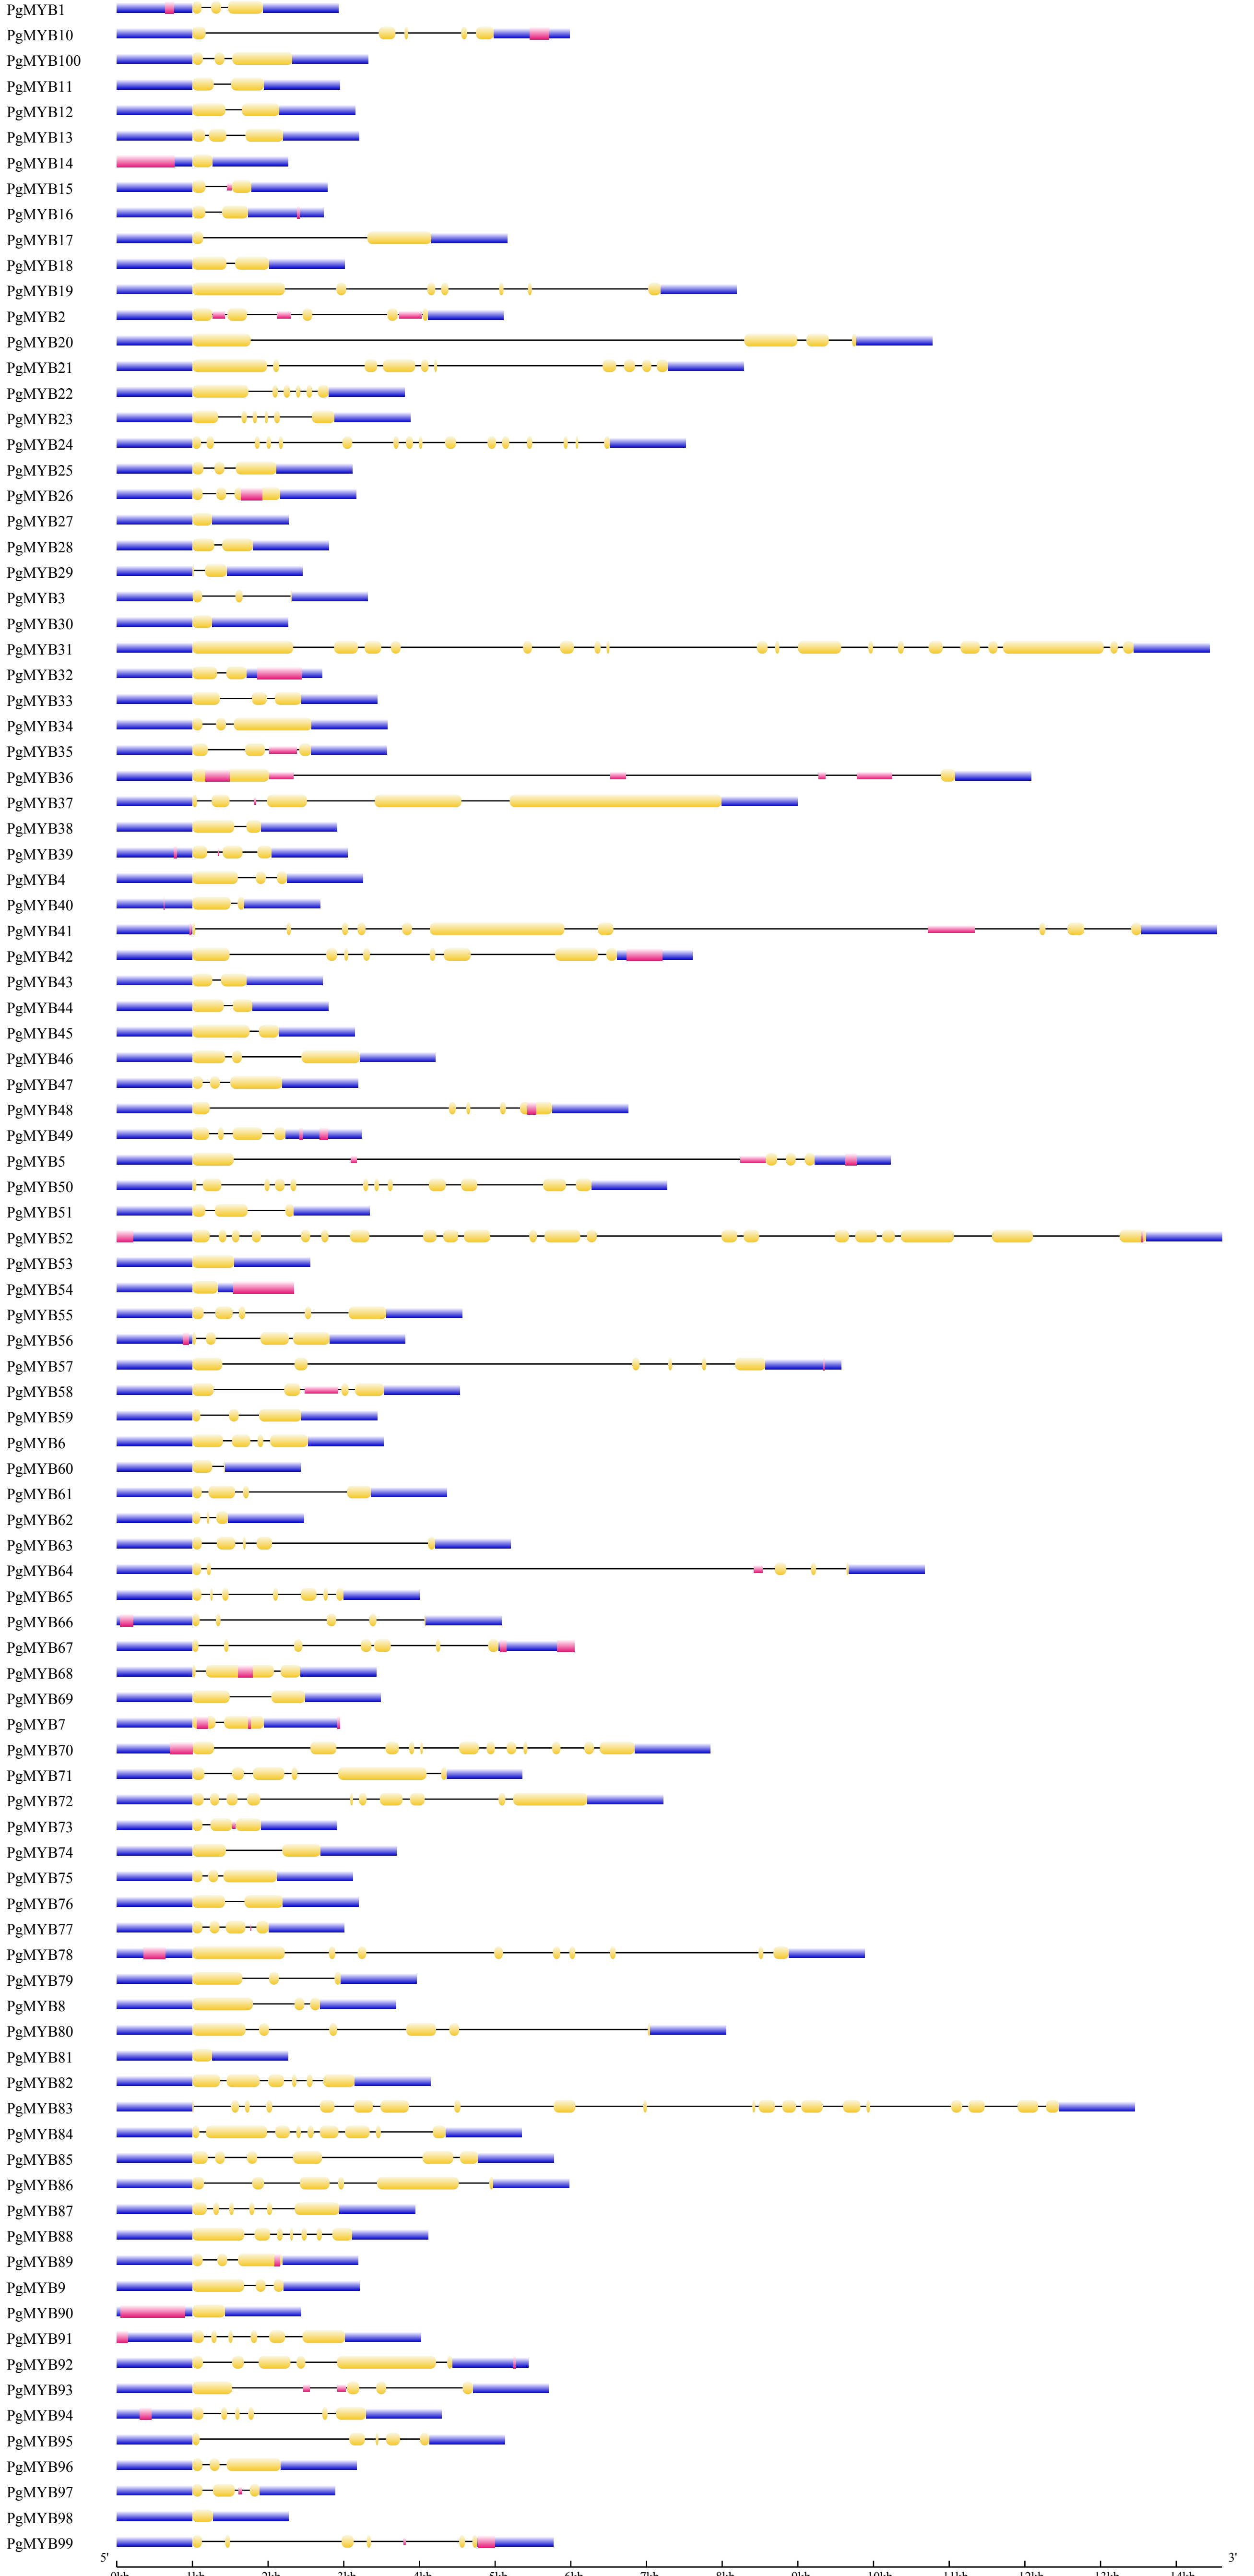

Supplement: Supplementary file 1 [file supplementary]

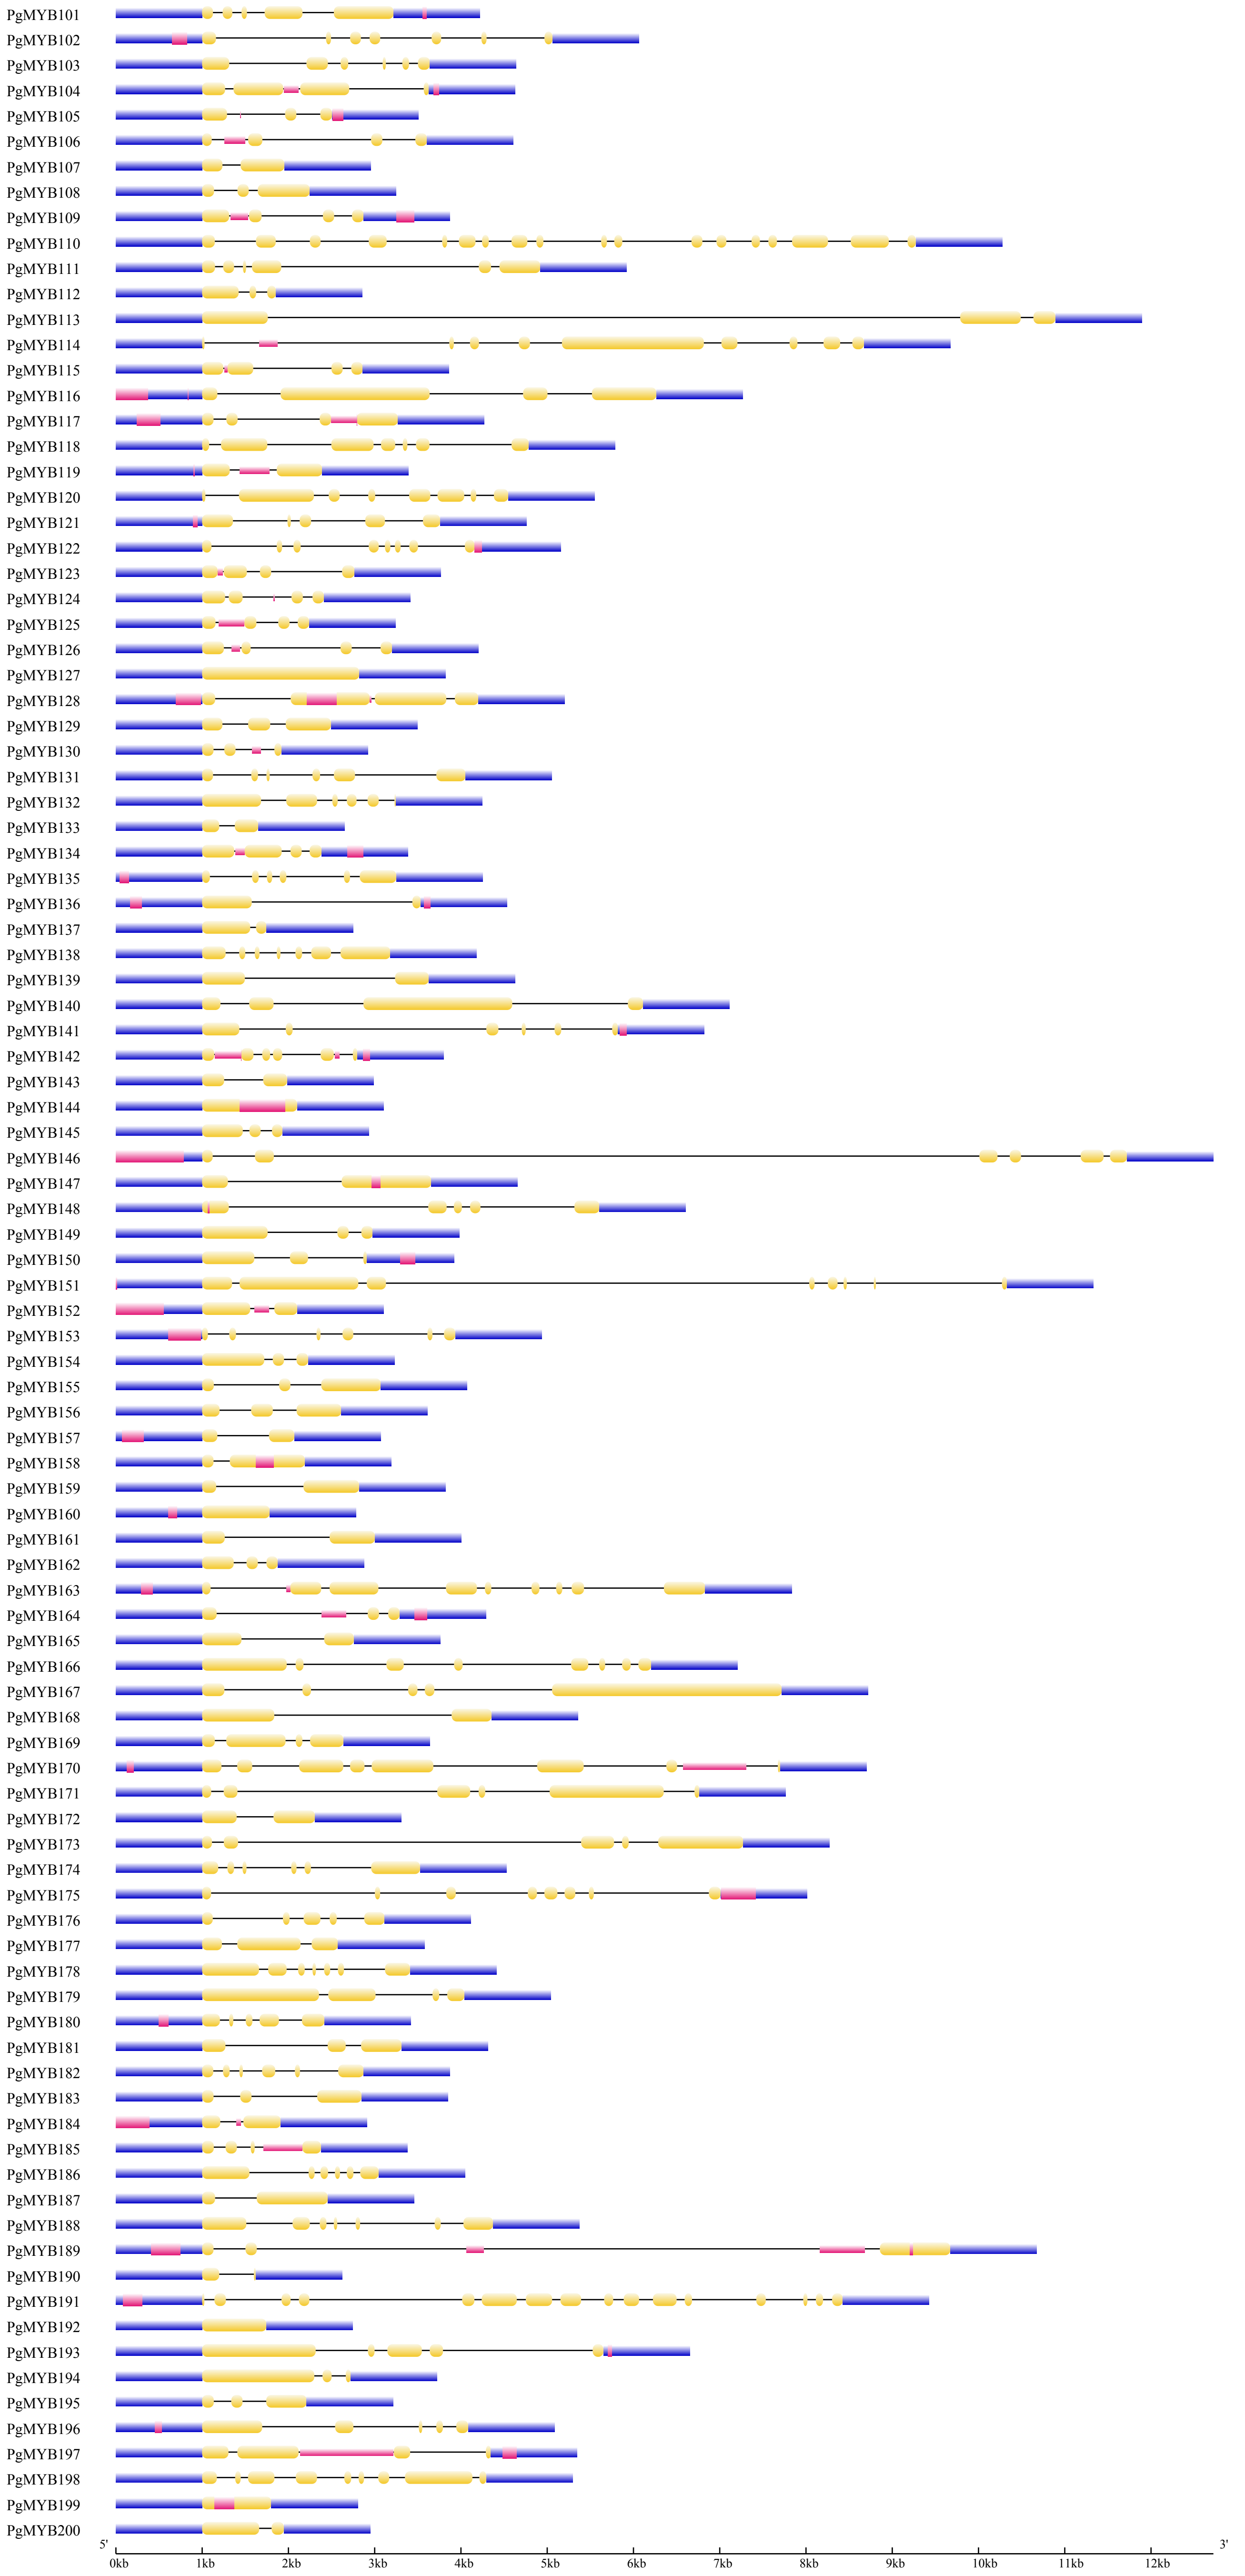

Legend:  
CDS upstream/ downstream Intron NSI

Supplement: Supplementary file 2 [file supplementary]

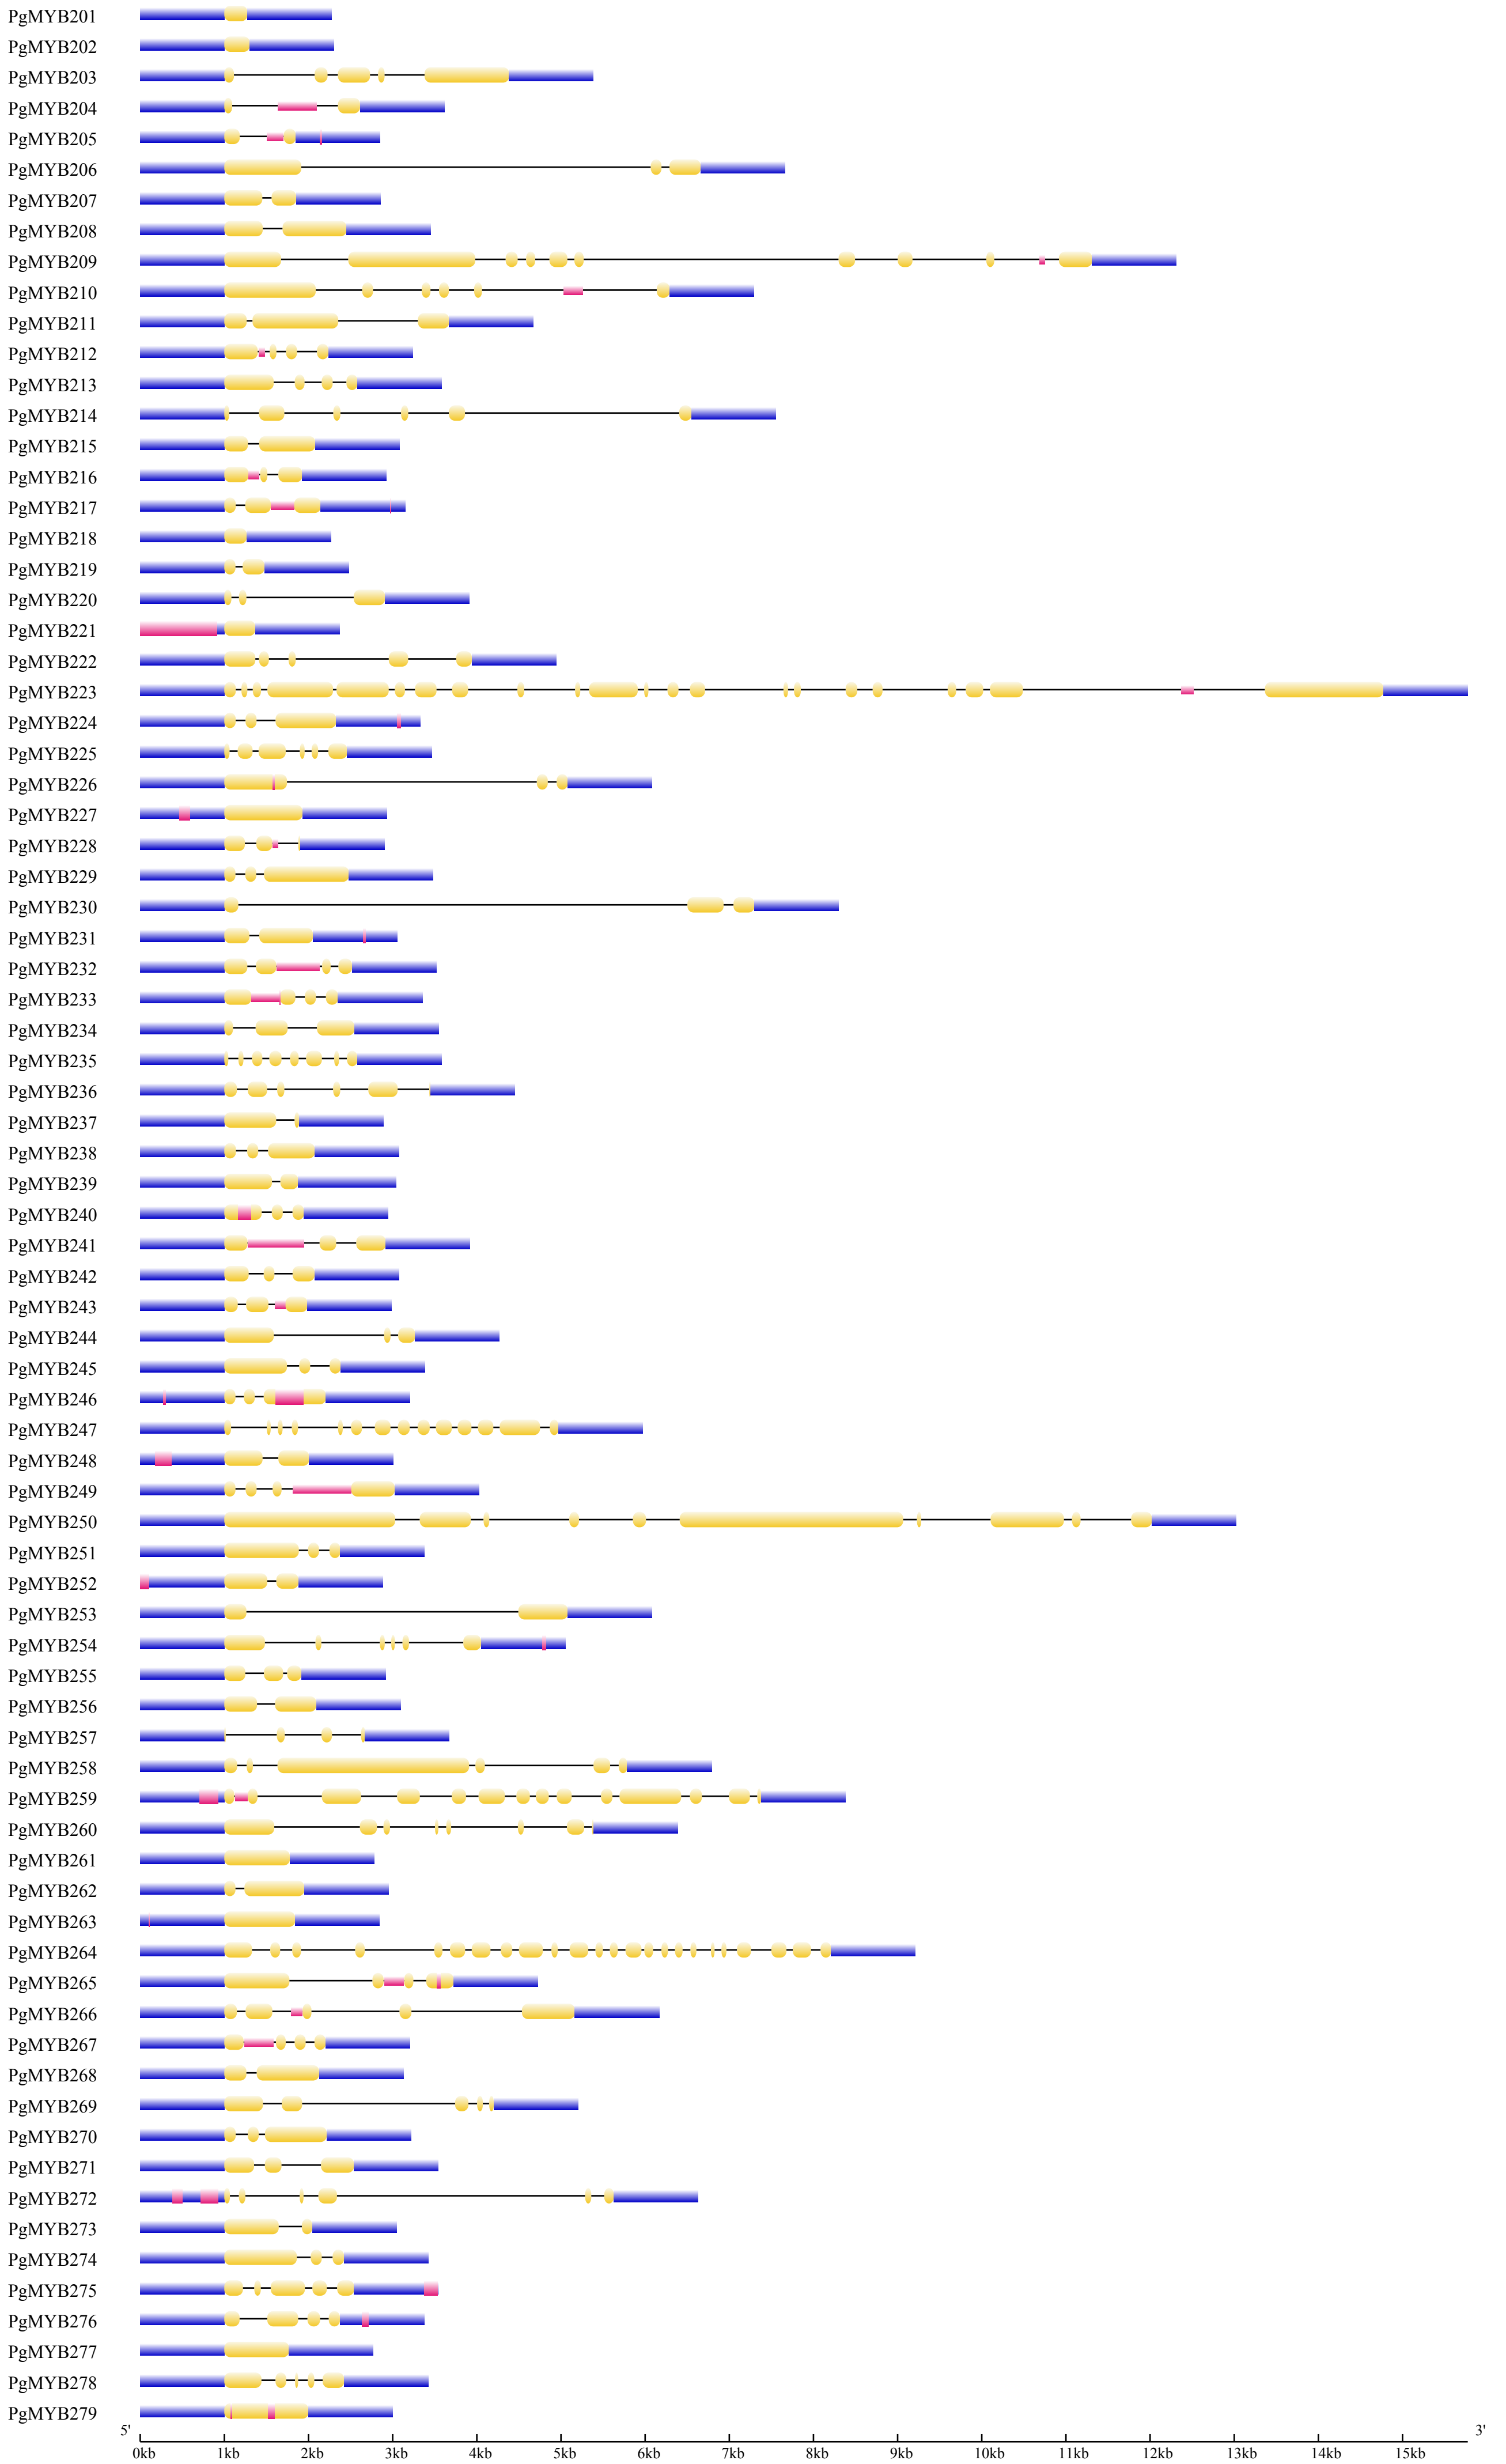

Supplement: Supplementary file 3 [file supplementary]
